# Supplementary material for: Parallel-stranded DNA: Enhancing duplex stability by the ‘G-clamp’ and a pyrrolo-dC derivative
Source: Royal Society of Chemistry journal article supplement (doi:10.1039/c2ob06606h), 2011-12-07
Supplement: c2ob06606h.pdf [file c2ob06606h.pdf]

## Supplementary Information

### Parallel-stranded DNA: Enhancing duplex stability by the ‘G-clamp’ and a pyrrolo-dC derivative

**Xin Ming,<sup>1</sup> Ping Ding,<sup>1,2</sup> Peter Leonard,<sup>1</sup> Simone Budow<sup>1</sup> and Frank Seela<sup>1,2\*</sup>**

<sup>1</sup>Laboratory of Bioorganic Chemistry and Chemical Biology, Center for Nanotechnology, Heisenbergstrasse 11, 48149 Münster, Germany and <sup>2</sup>Laboratorium für Organische und Bioorganische Chemie, Institut für Chemie, Universität Osnabrück, Barbarastrasse 7, 49069 Osnabrück, Germany

Corresponding author:

Prof. Dr. Frank Seela

Phone: +49 (0)251-53406-500

Fax: +49 (0)251-53406-587

E-mail: [Frank.Seela@uni-osnabrueck.de](mailto:Frank.Seela@uni-osnabrueck.de)

Home page: [www.seela.net](http://www.seela.net)

## Table of Contents

|                    |                                                                                                                                                                |       |
|--------------------|----------------------------------------------------------------------------------------------------------------------------------------------------------------|-------|
| <b>Table S1.</b>   | $^1\text{H}$ - $^{13}\text{C}$ -coupling constants of compounds <b>6</b> , <b>13</b> and <b>15</b> .....                                                       | 2     |
| <b>Table S2.</b>   | Molecular masses of oligonucleotides determined by mass spectrometry.....                                                                                      | 3     |
| <b>Figure S1.</b>  | LC-ESI-MS chromatogram of ODN- <b>28</b> .....                                                                                                                 | 4     |
| <b>Figure S2.</b>  | LC-ESI-MS chromatogram of ODN- <b>29</b> .....                                                                                                                 | 5     |
| <b>Figure S3.</b>  | Maldi-TOF mass spectrum of ODN- <b>33</b> .....                                                                                                                | 6     |
| <b>Figure S4.</b>  | Maldi-TOF mass spectrum of ODN- <b>34</b> .....                                                                                                                | 7     |
| <b>Figure S5.</b>  | Maldi-TOF mass spectrum of ODN- <b>35</b> .....                                                                                                                | 8     |
| <b>Figure S6.</b>  | Melting curves of parallel stranded duplexes <b>27•30</b> , <b>28•30</b> , <b>29•30</b> , <b>28•31</b> . ....                                                  | 9     |
| <b>Figure S7.</b>  | Melting curves of parallel stranded duplexes <b>24•26</b> , <b>32•33</b> , <b>34•33</b> , <b>35•33</b> ,<br><b>32•36</b> , <b>34•36</b> and <b>35•36</b> ..... | 10-11 |
| <b>Figure S8.</b>  | Melting curves of antiparallel stranded duplexes <b>24•25</b> , <b>32•37</b> , <b>34•37</b> and<br><b>35•37</b> .....                                          | 12    |
| <b>Figure S9.</b>  | $^1\text{H}$ -NMR spectrum of compound <b>6</b> .....                                                                                                          | 13    |
| <b>Figure S10.</b> | $^{13}\text{C}$ -NMR spectrum of compound <b>6</b> .....                                                                                                       | 14    |
| <b>Figure S11.</b> | DEPT-135 spectrum of compound <b>6</b> .....                                                                                                                   | 15    |
| <b>Figure S12.</b> | $^1\text{H}$ - $^{13}\text{C}$ -gated decoupled spectrum of compound <b>6</b> .....                                                                            | 16    |
| <b>Figure S13.</b> | $^1\text{H}$ -NMR spectrum of compound <b>13</b> .....                                                                                                         | 17    |
| <b>Figure S14.</b> | $^{13}\text{C}$ -NMR spectrum of compound <b>13</b> .....                                                                                                      | 18    |
| <b>Figure S15.</b> | DEPT-135 spectrum of compound <b>13</b> .....                                                                                                                  | 19    |
| <b>Figure S16.</b> | $^1\text{H}$ - $^{13}\text{C}$ -gated decoupled spectrum of compound <b>13</b> .....                                                                           | 20    |
| <b>Figure S17.</b> | $^1\text{H}$ -NMR spectrum of compound <b>15</b> .....                                                                                                         | 21    |
| <b>Figure S18.</b> | $^{13}\text{C}$ -NMR spectrum of compound <b>15</b> .....                                                                                                      | 22    |
| <b>Figure S19.</b> | DEPT-135 spectrum of compound <b>15</b> .....                                                                                                                  | 23    |
| <b>Figure S20.</b> | $^1\text{H}$ - $^{13}\text{C}$ -gated decoupled spectrum of compound <b>15</b> .....                                                                           | 24    |
| <b>Figure S21.</b> | $^{31}\text{P}$ -NMR spectrum of compound <b>5</b> .....                                                                                                       | 25    |
| <b>Figure S22.</b> | $^1\text{H}$ -NMR spectrum of the DMT-protected G-clamp.....                                                                                                   | 26    |
| <b>Figure S23.</b> | $^{13}\text{C}$ -NMR spectrum of the DMT-protected G-clamp .....                                                                                               | 27    |
| <b>Figure S24.</b> | $^1\text{H}$ -NMR spectrum of compound <b>16</b> .....                                                                                                         | 28    |
| <b>Figure S25.</b> | $^{13}\text{C}$ -NMR spectrum of compound <b>16</b> .....                                                                                                      | 29    |
| <b>Figure S26.</b> | $^{31}\text{P}$ -NMR spectrum of compound <b>16</b> .....                                                                                                      | 30    |

**Table S1.**  $^1\text{H}$ - $^{13}\text{C}$ -coupling constants of compounds **6**, **13** and **15**.<sup>a,b</sup>

| $^1\text{H}$ - $^{13}\text{C}$ coupling constants | $J$ [Hz] |           |           |
|---------------------------------------------------|----------|-----------|-----------|
|                                                   | <b>6</b> | <b>13</b> | <b>15</b> |
| $^1J(\text{C4}, \text{H-C4})$                     | 187.4    | -         | 182.6     |
| $^2J(\text{C4a}, \text{H-C4})$                    | 3.6      | -         | -         |
| $^3J(\text{C7a}, \text{H-C4})$                    | 7.1      | -         | 7.5       |
| $^1J(\text{C5}, \text{H-C5})$                     | 185.4    | -         | 178.8     |
| $^2J(\text{C4a}, \text{H-C5})$                    | 3.6      | -         | -         |
| $^3J(\text{C7a}, \text{H-C5})$                    | 7.1      | -         | 7.5       |
| $^2J(\text{C6}, \text{H-C5})$                     | 5.0      | -         | 9.8       |
| $^1J(\text{C1}', \text{H-C1}')$                   | 173.5    | -         | 174.6     |
| $^1J(\text{C3}', \text{H-C3}')$                   | 147.3    | -         | 148.1     |
| $^1J(\text{C4}', \text{H-C4}')$                   | 146.3    | -         | 146.3     |
| $^1J(\text{C5}', \text{H-C5}')$                   | 139.4    | -         | 141.3     |
| $^1J(\text{C1}'', \text{H-C1}'')$                 | -        | 142.1     | 142.1     |
| $^1J(\text{C2}'', \text{H-C2}'')$                 | -        | 129.8     | 130.1     |
| $^1J(\text{C3}'', \text{H-C3}'')$                 | -        | 139.1     | 139.3     |

<sup>a</sup> Measured in  $\text{DMSO-}d_6$  at 298 K. <sup>b</sup> Systematic numbering.

**Table S2.** Molecular masses of oligonucleotides determined by mass spectrometry.

|        | Sequence                                   | Mol. Wt.<br>(calc.) | Mol. Wt.<br>(found) |
|--------|--------------------------------------------|---------------------|---------------------|
| ODN-28 | 5'-d(TCTC3CTCTC)-3'                        | 3038                | 3038 <sup>a</sup>   |
| ODN-29 | 5'-d(TCTC4CTCTC)-3'                        | 3037                | 3037 <sup>a</sup>   |
| ODN-33 | 5'-d(TT1 TTT TTT TAT TAA AAT TTA T1A A)-3' | 7665                | 7664 <sup>b</sup>   |
| ODN-34 | 5'-d(AA3 AAA AAA ATA ATT TTA AAT A3T T)-3' | 7945                | 7948 <sup>c</sup>   |
| ODN-35 | 5'-d(AA4 AAA AAA ATA ATT TTA AAT A4T T)-3' | 7944                | 7944 <sup>c</sup>   |

<sup>a</sup> Measured by LC-ESI-TOF mass spectrometry. <sup>b</sup> Measured by MALDI-TOF mass spectrometry in the linear negative mode. <sup>c</sup> Measured by MALDI-TOF mass spectrometry in the linear positive mode.

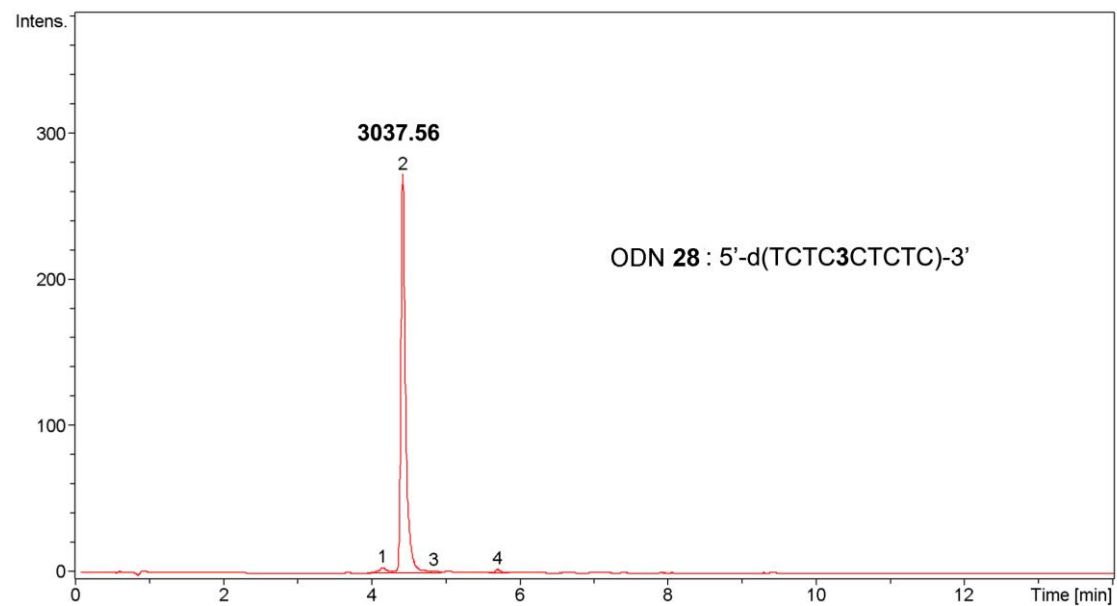

| # | RT [min] | Area Frac. % | Max. MW  |
|---|----------|--------------|----------|
| 1 | 4.2      | 2.3          | 3070.532 |
| 2 | 4.4      | 96.0         | 3037.561 |
| 3 | 4.8      | 0.7          | 3037.525 |
| 4 | 5.7      | 1.0          | 4729.804 |

**Figure S1.** LC-ESI-MS chromatogram of ODN-28.

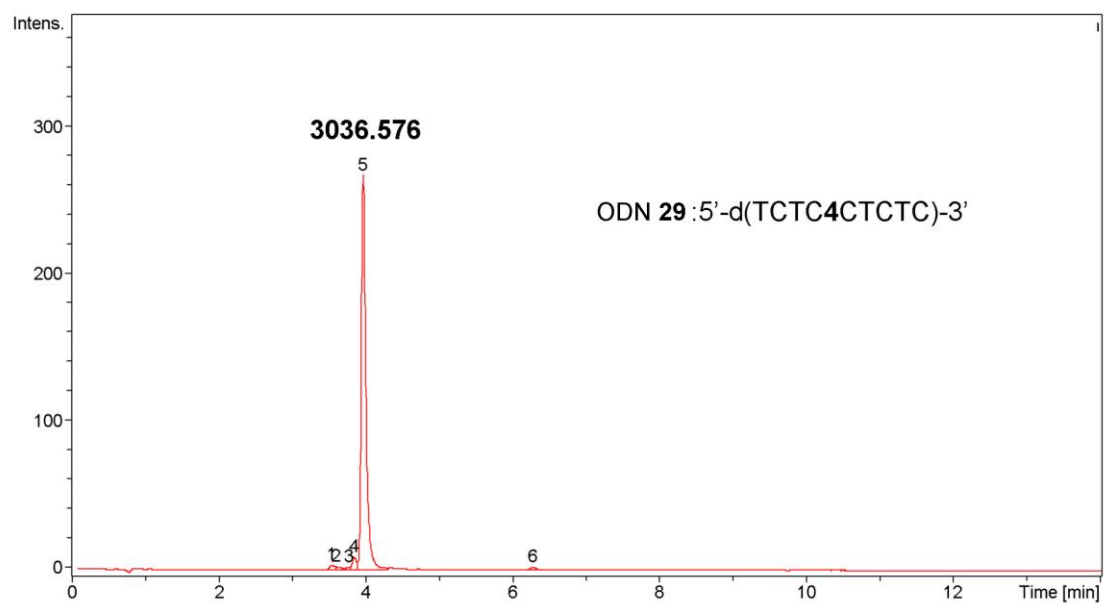

| # | RT [min] | Area Frac. % | Max. MW  |
|---|----------|--------------|----------|
| 1 | 3.5      | 1.2          | 2732.490 |
| 2 | 3.6      | 0.9          | 2747.488 |
| 3 | 3.8      | 0.6          |          |
| 4 | 3.8      | 2.8          | 3036.556 |
| 5 | 4.0      | 93.7         | 3036.576 |
| 6 | 6.3      | 0.8          |          |

**Figure S2.** LC-ESI-MS chromatogram of ODN-29.

**Applied Biosystems Voyager System 6327**

Voyager Spec #1=>MC[BP = 8453.2, 2972]

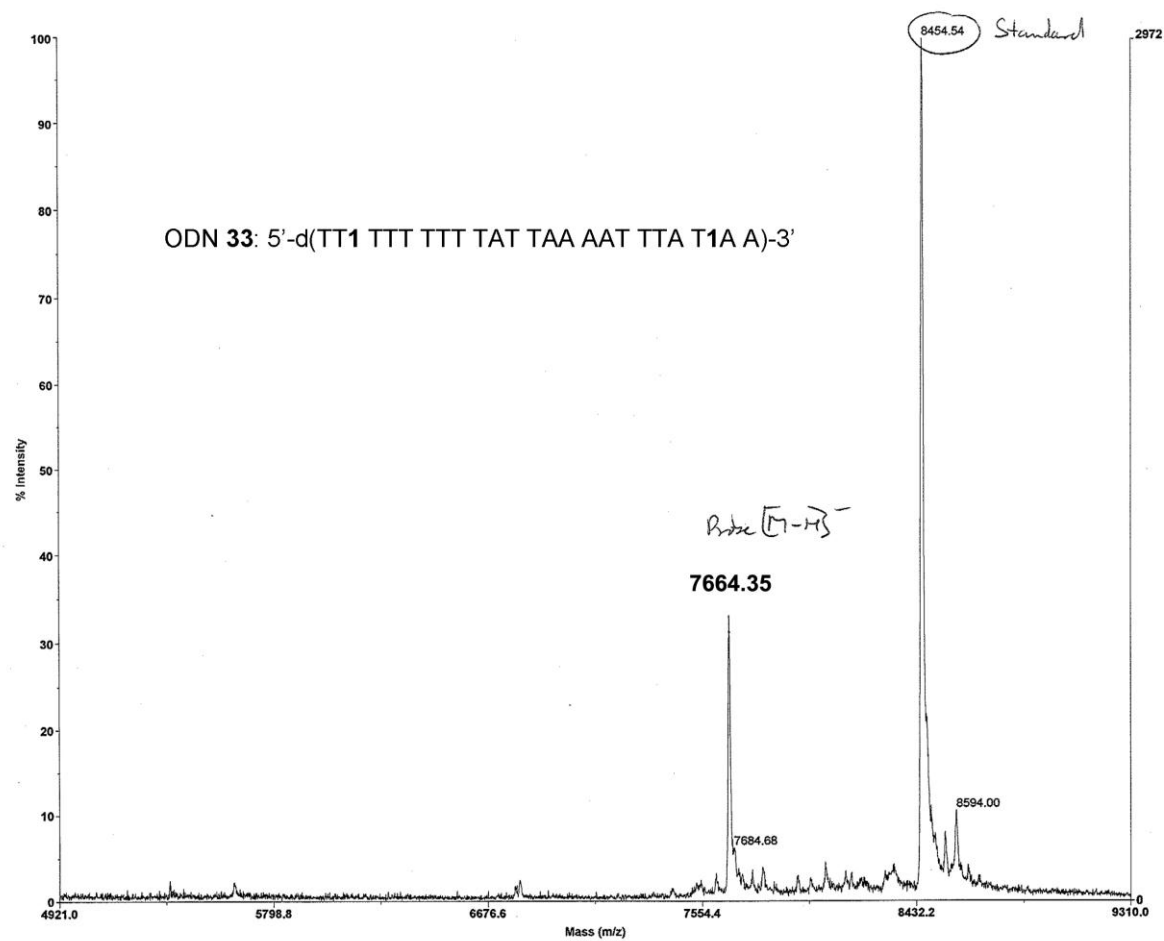

**Figure S3.** Maldi-TOF mass spectrum of ODN-33.

---

Bruker Autoflex Speed

Org. Chem. Inst. WWU

---

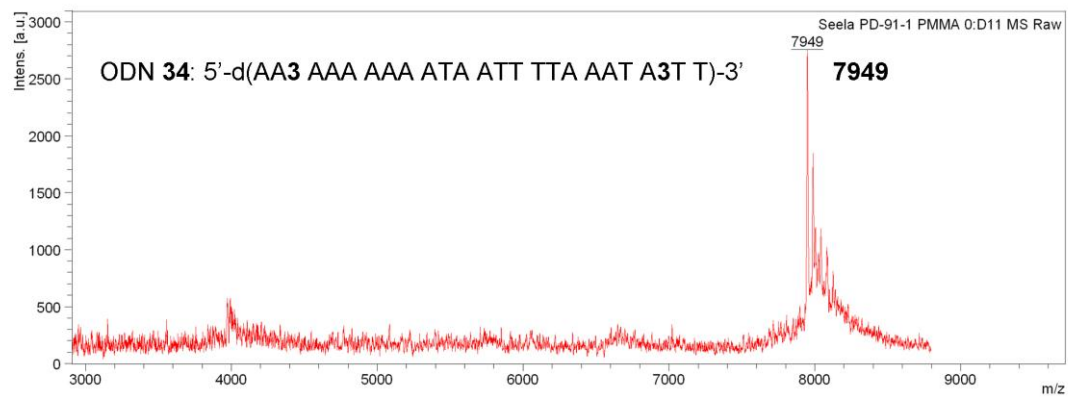

**Figure S4.** Maldi-TOF mass spectrum of ODN-34.



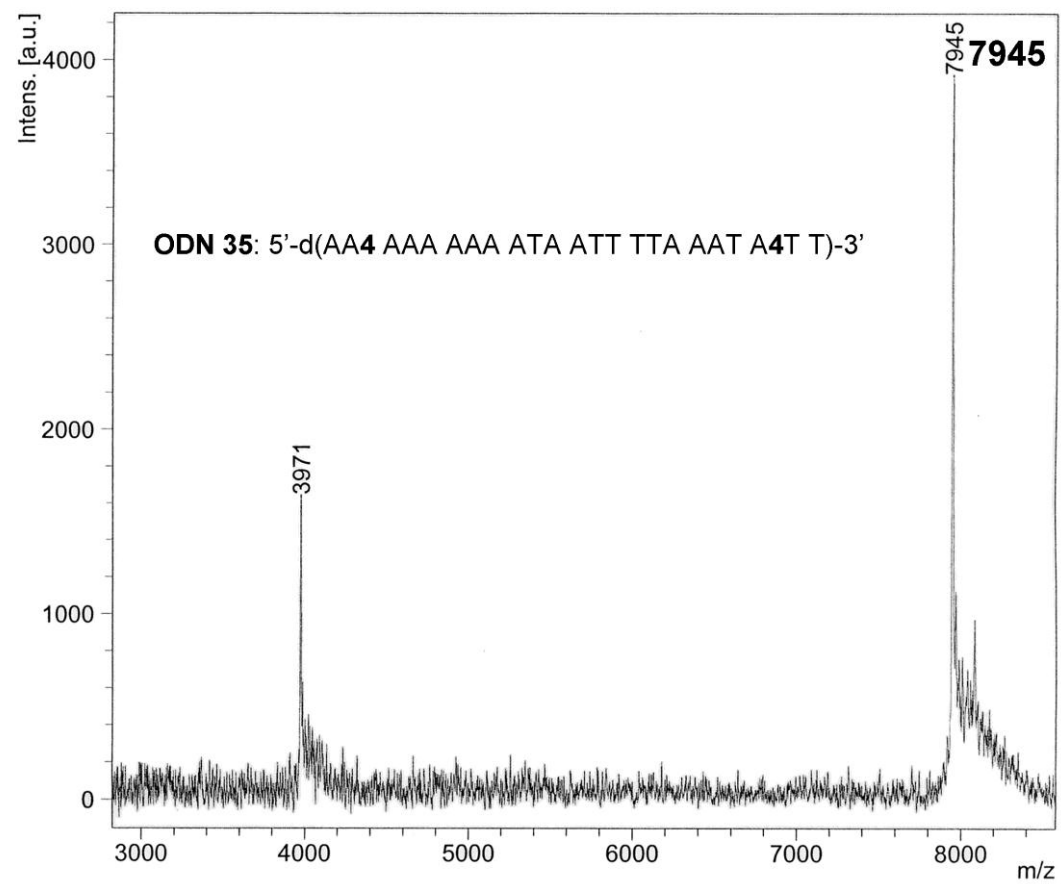

**Figure S5.** Maldi-TOF mass spectrum of ODN-35.

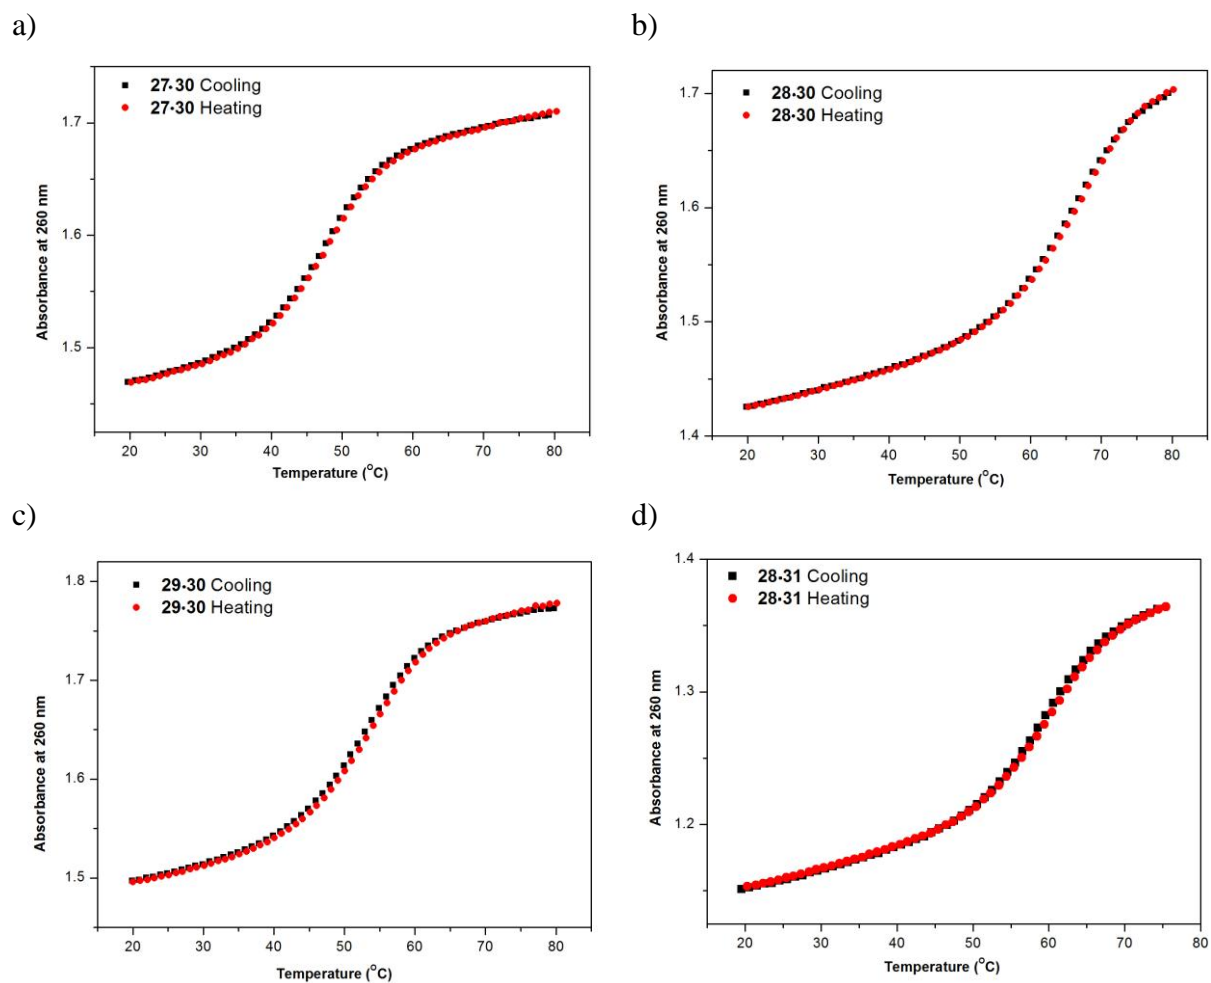

**Figure S6.** Melting curves of parallel stranded duplexes obtained from cooling (black square) and heating (red circle) experiments monitored at 260 nm and measured in 0.1 M NaCl, 10 mM MgCl<sub>2</sub>, 10 mM Na-cacodylate (pH 7.0) with 5 μM + 5 μM single-strand concentration. (a) Duplex **27•30**; (b) duplex **28•30**; (c) duplex **29•30** and (d) duplex **28•31**.

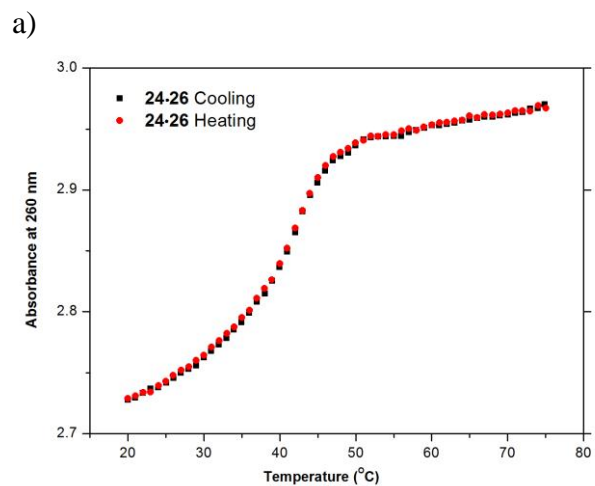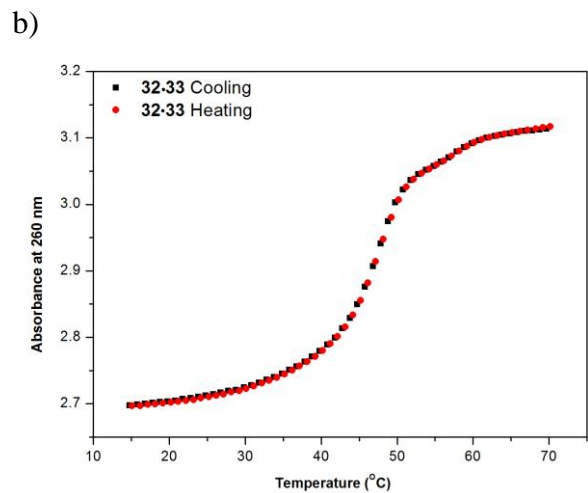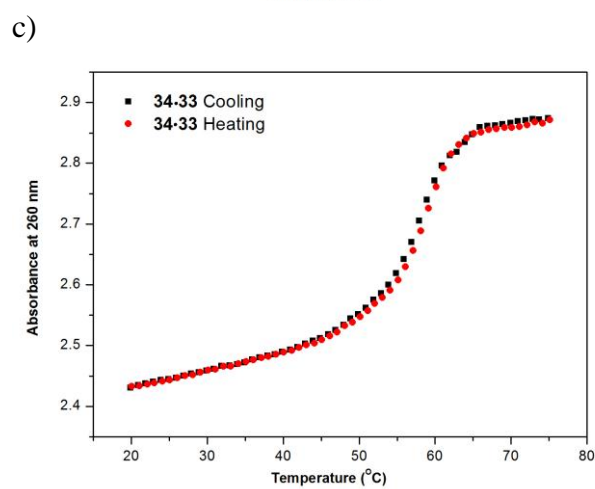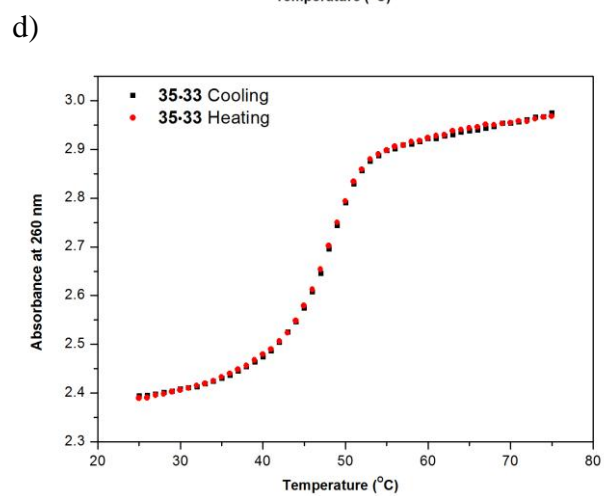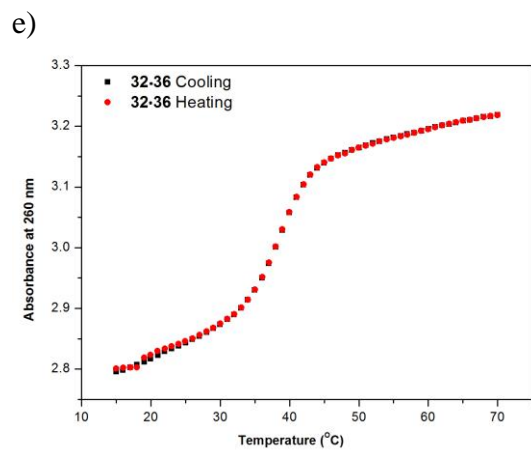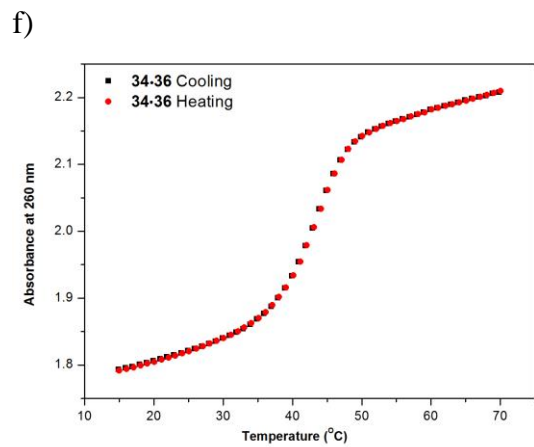

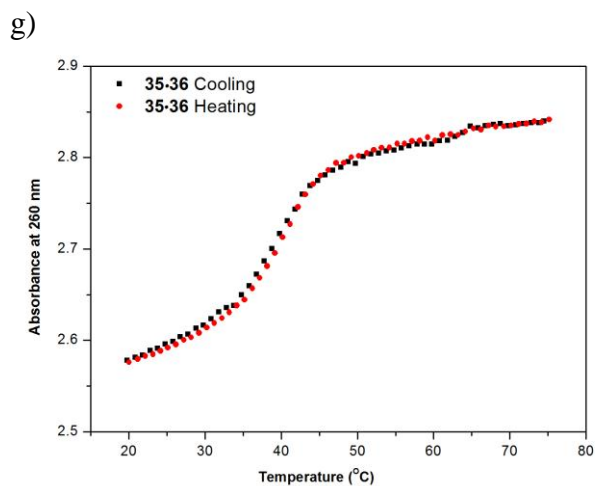

**Figure S7.** Melting curves of parallel stranded duplexes obtained from cooling (black square) and heating (red circle) experiments monitored at 260 nm and measured in 0.1 M NaCl, 10 mM MgCl<sub>2</sub>, 10 mM Na-cacodylate (pH 7.0) with 5 μM + 5 μM single-strand concentration. (a) Duplex **24•26**; (b) duplex **32•33**; (c) duplex **34•33**; (d) duplex **35•33**; (e) duplex **32•36**; (f) duplex **34•36** and (g) duplex **35•36**.

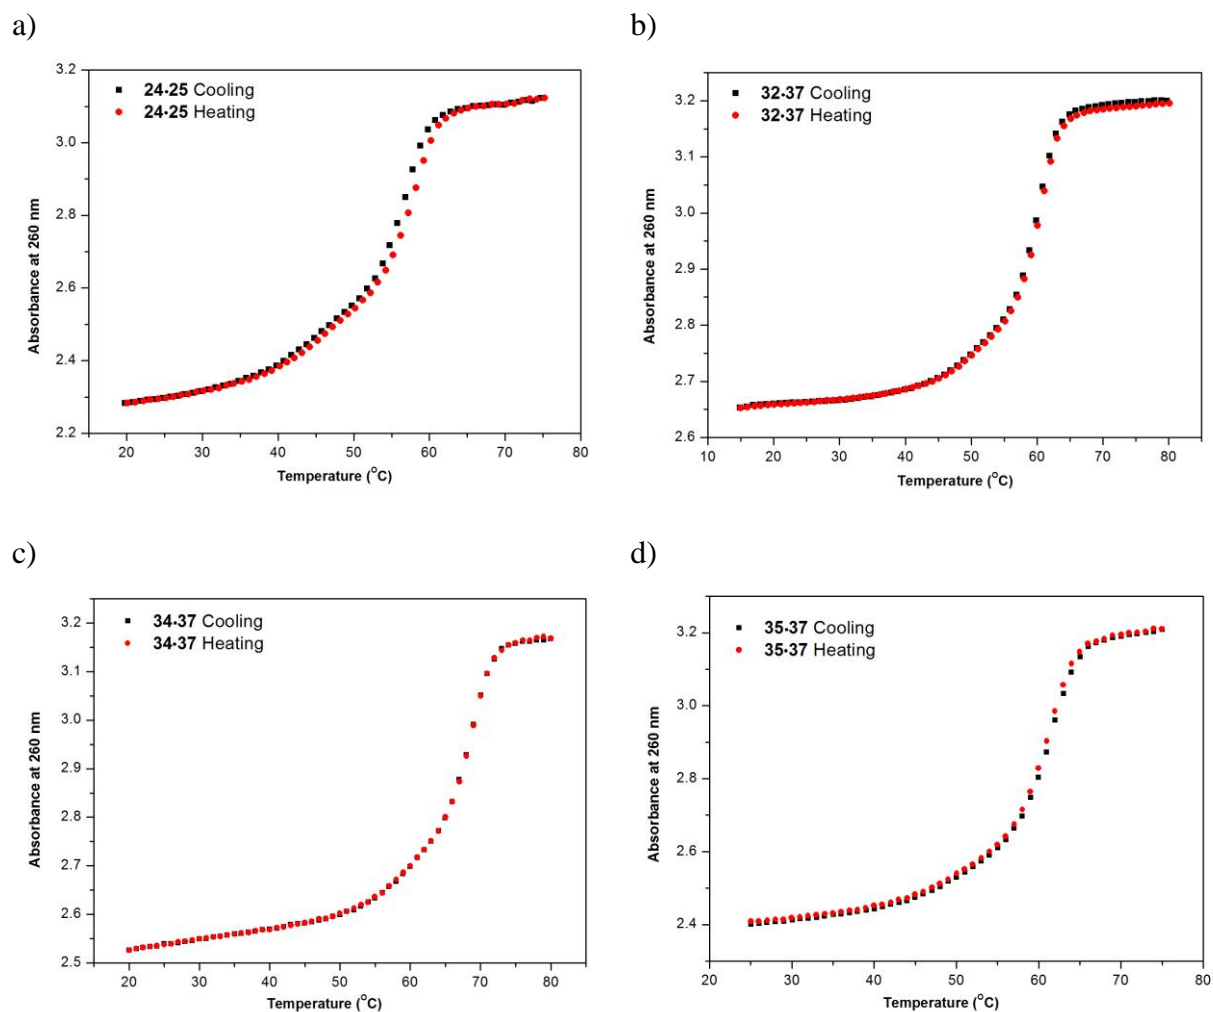

**Figure S8.** Melting curves of antiparallel stranded duplexes obtained from cooling (black square) and heating (red circle) experiments monitored at 260 nm and measured in 0.1 M NaCl, 10 mM MgCl<sub>2</sub>, 10 mM Na-cacodylate (pH 7.0) with 5 μM + 5 μM single-strand concentration. (a) Duplex **24•25**; (b) duplex **32•37**; (c) duplex **34•37** and (d) duplex **35•37**.

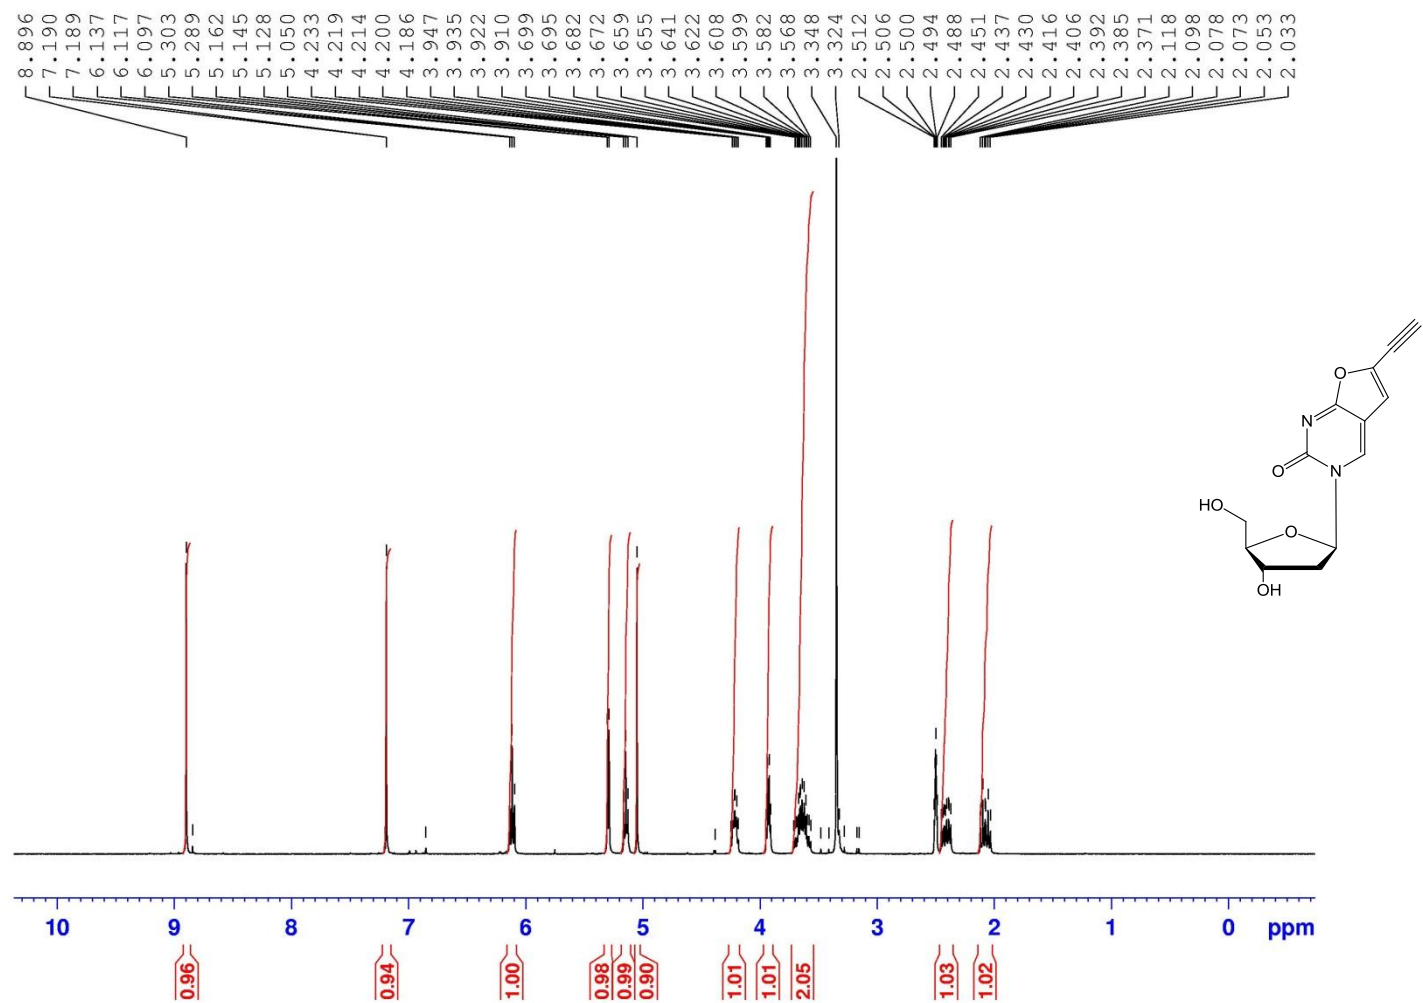

**Figure S9.** <sup>1</sup>H-NMR spectrum of 3-(2-deoxy-β-D-erythro-pentofuranosyl)-6-ethynyl-furo[2,3-d]pyrimidin-2(3H)-one (**6**).

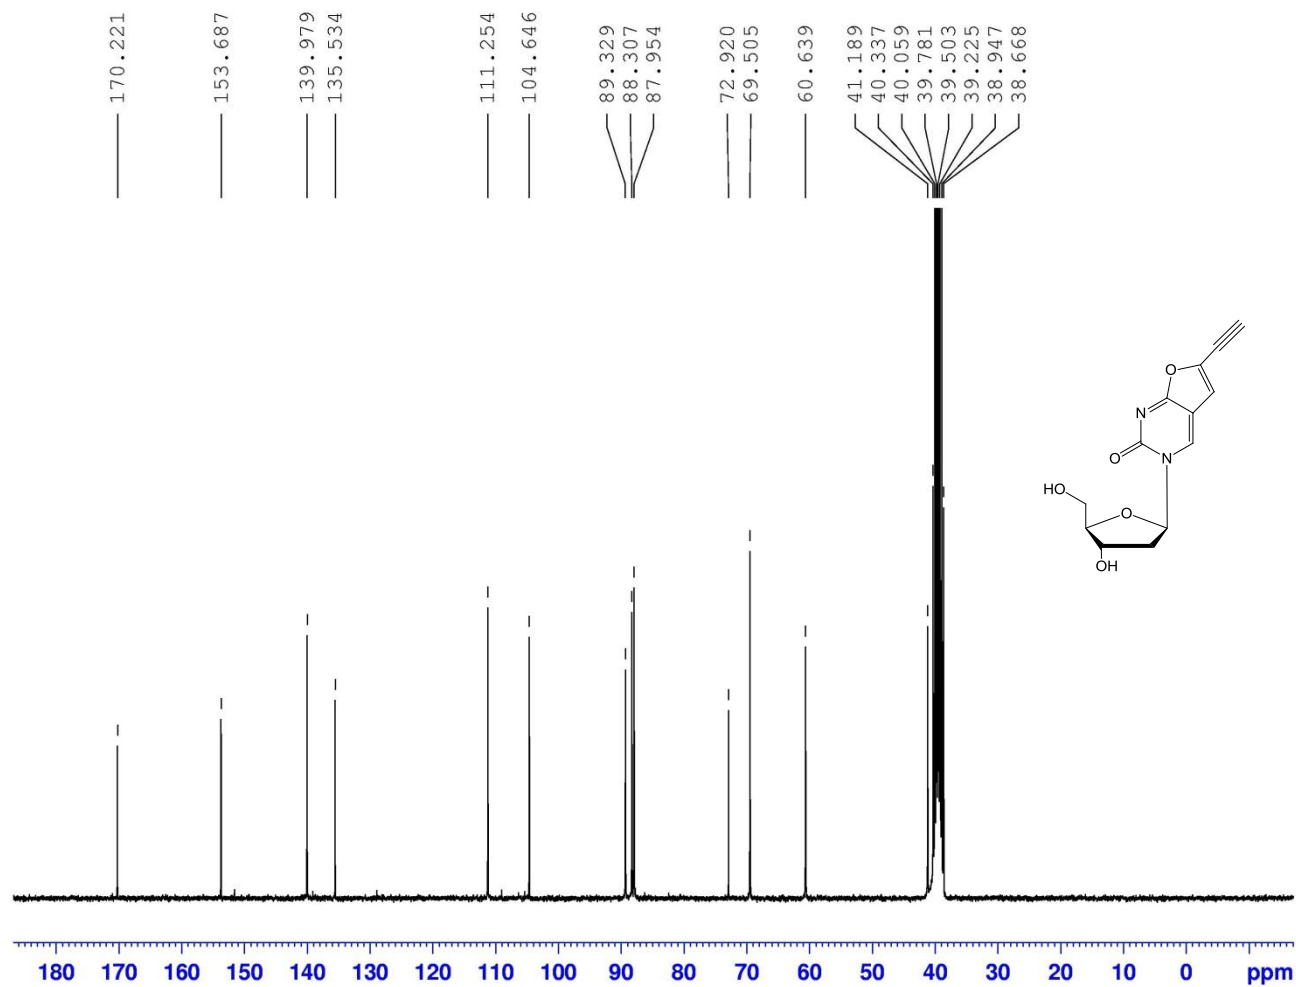

**Figure S10.** <sup>13</sup>C-NMR spectrum of 3-(2-deoxy-β-D-erythro-pentofuranosyl)-6-ethynyl-furo[2,3-d]pyrimidin-2(3H)-one (**6**).

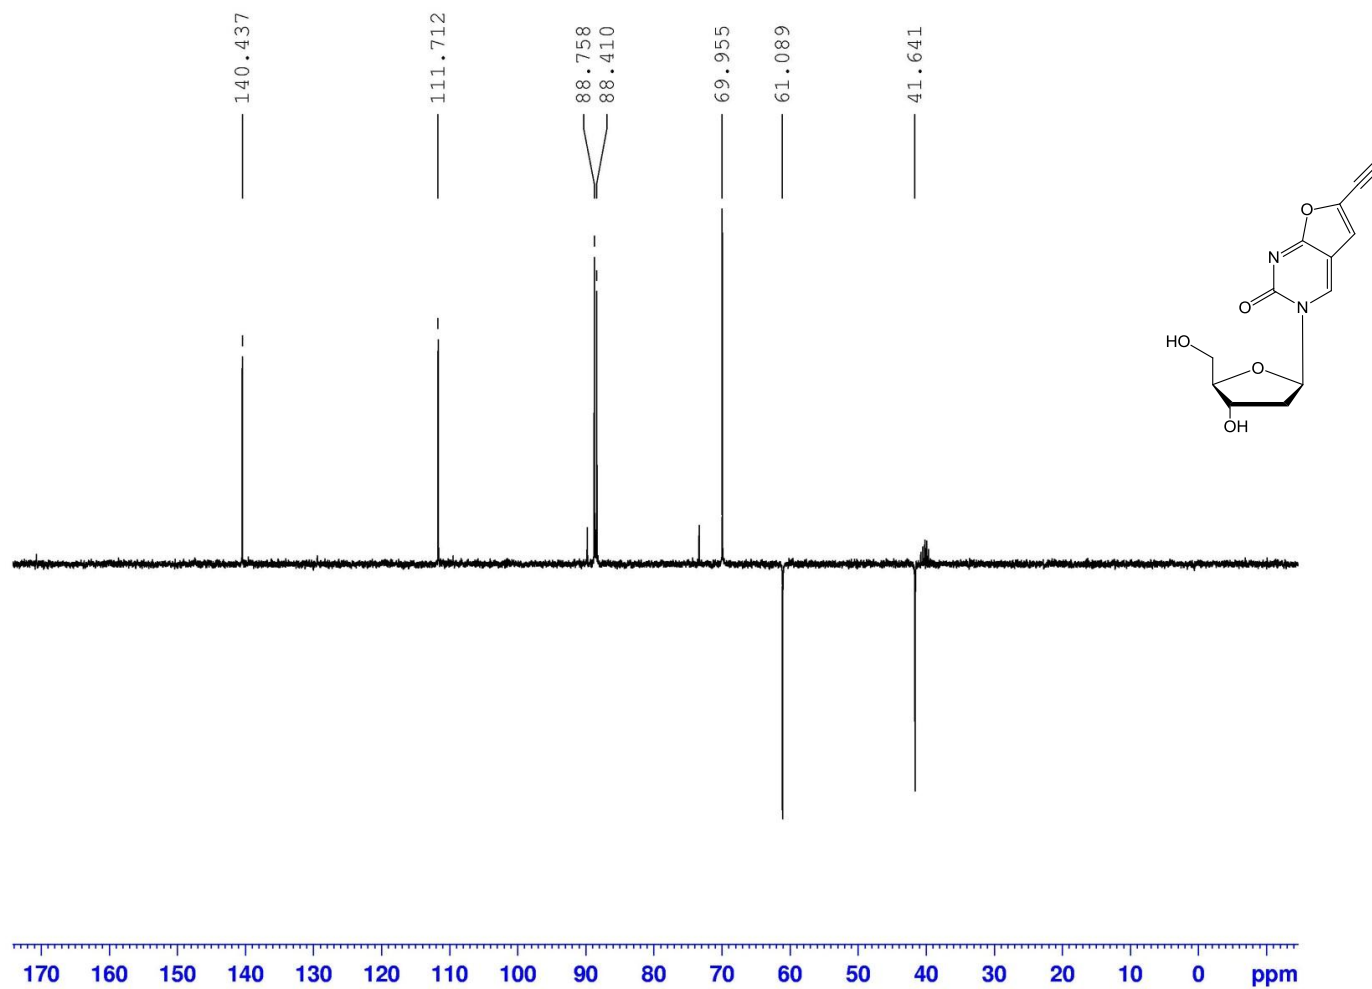

**Figure S11.** DEPT-135 spectrum of 3-(2-deoxy-β-D-erythro-pentofuranosyl)-6-ethynyl-furo[2,3-d]pyrimidin-2(3H)-one (**6**).



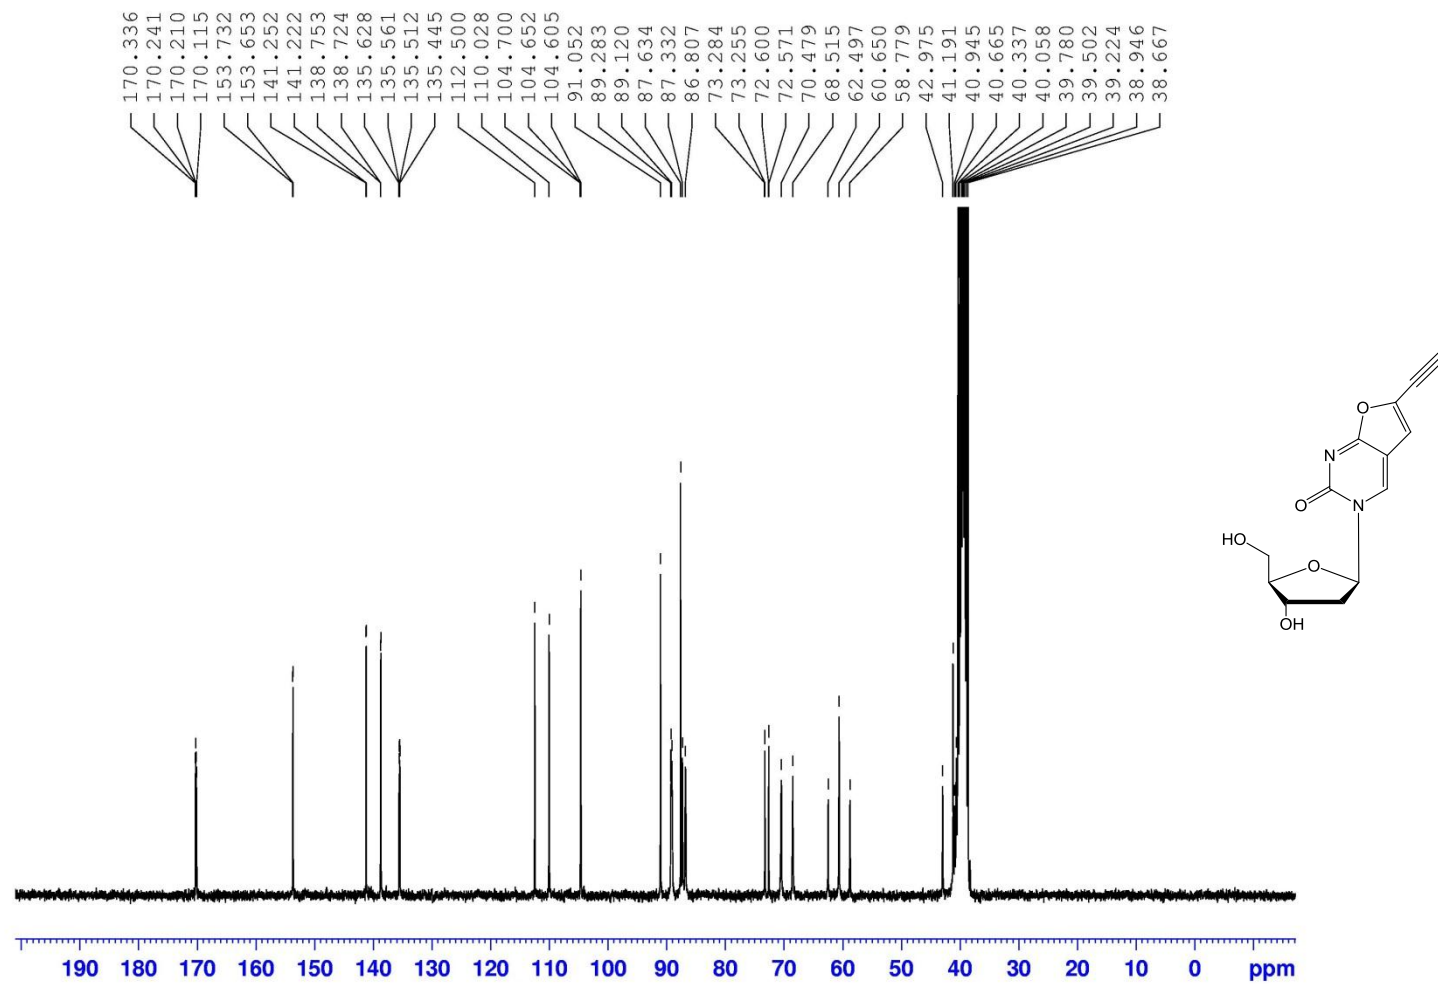

**Figure S12.**  $^1\text{H}$ - $^{13}\text{C}$ -gated decoupled spectrum of 3-(2-deoxy- $\beta$ -D-erythro-pentofuranosyl)-6-ethynyl-furo[2,3-*d*]pyrimidin-2(3*H*)-one (**6**).

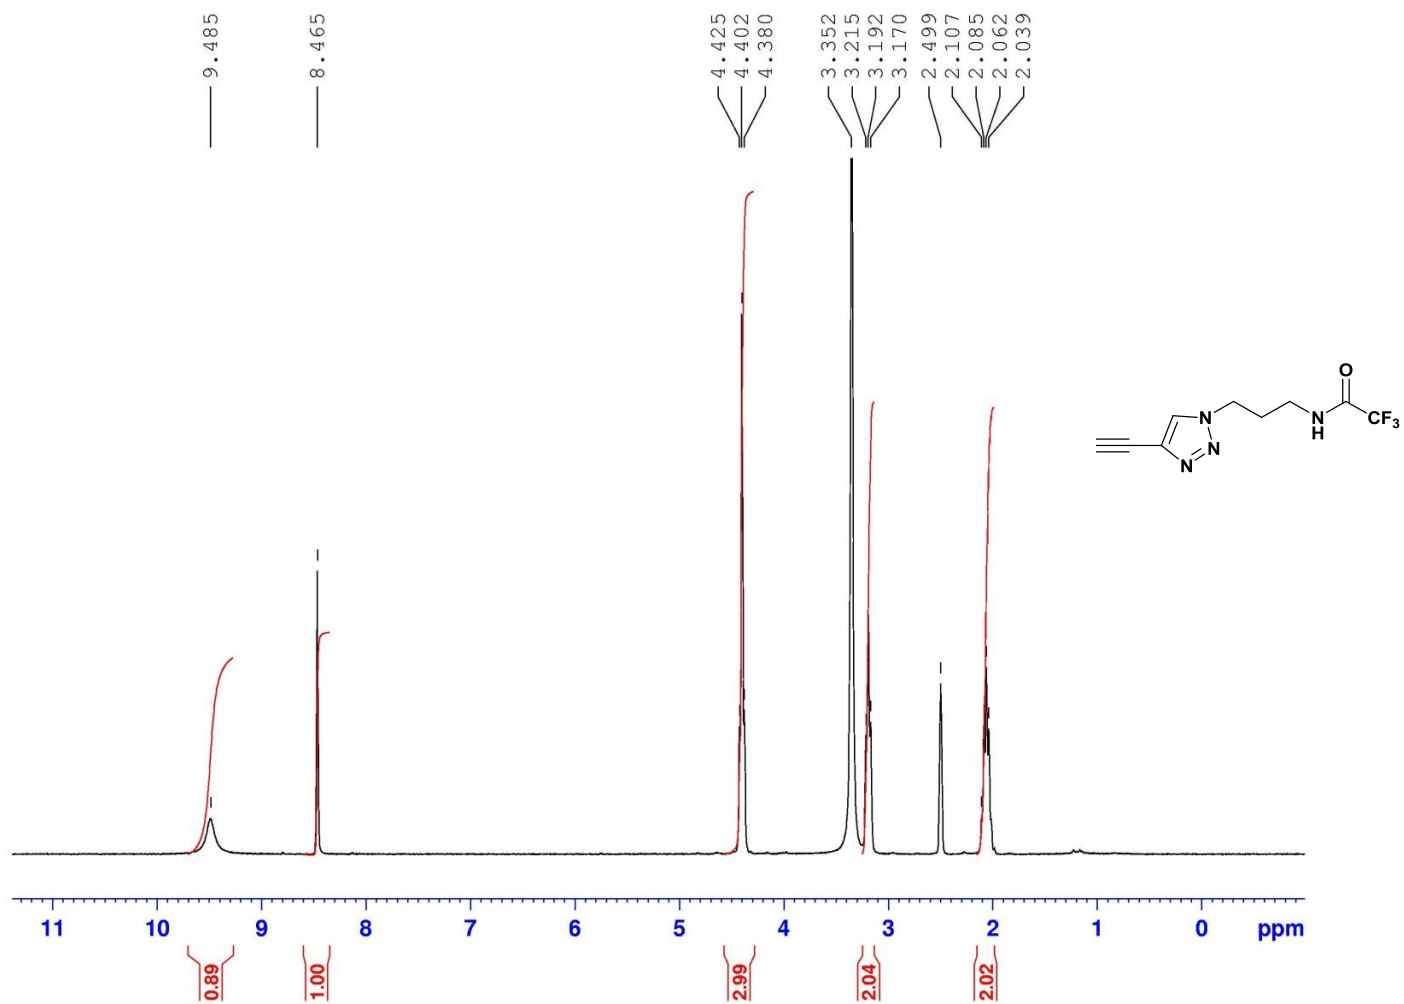

**Figure S13.** <sup>1</sup>H-NMR spectrum of *N*-(3-(4-ethynyl-1*H*-1,2,3-triazol-1-yl)propyl)-2,2,2-trifluoroacetamide (**13**).

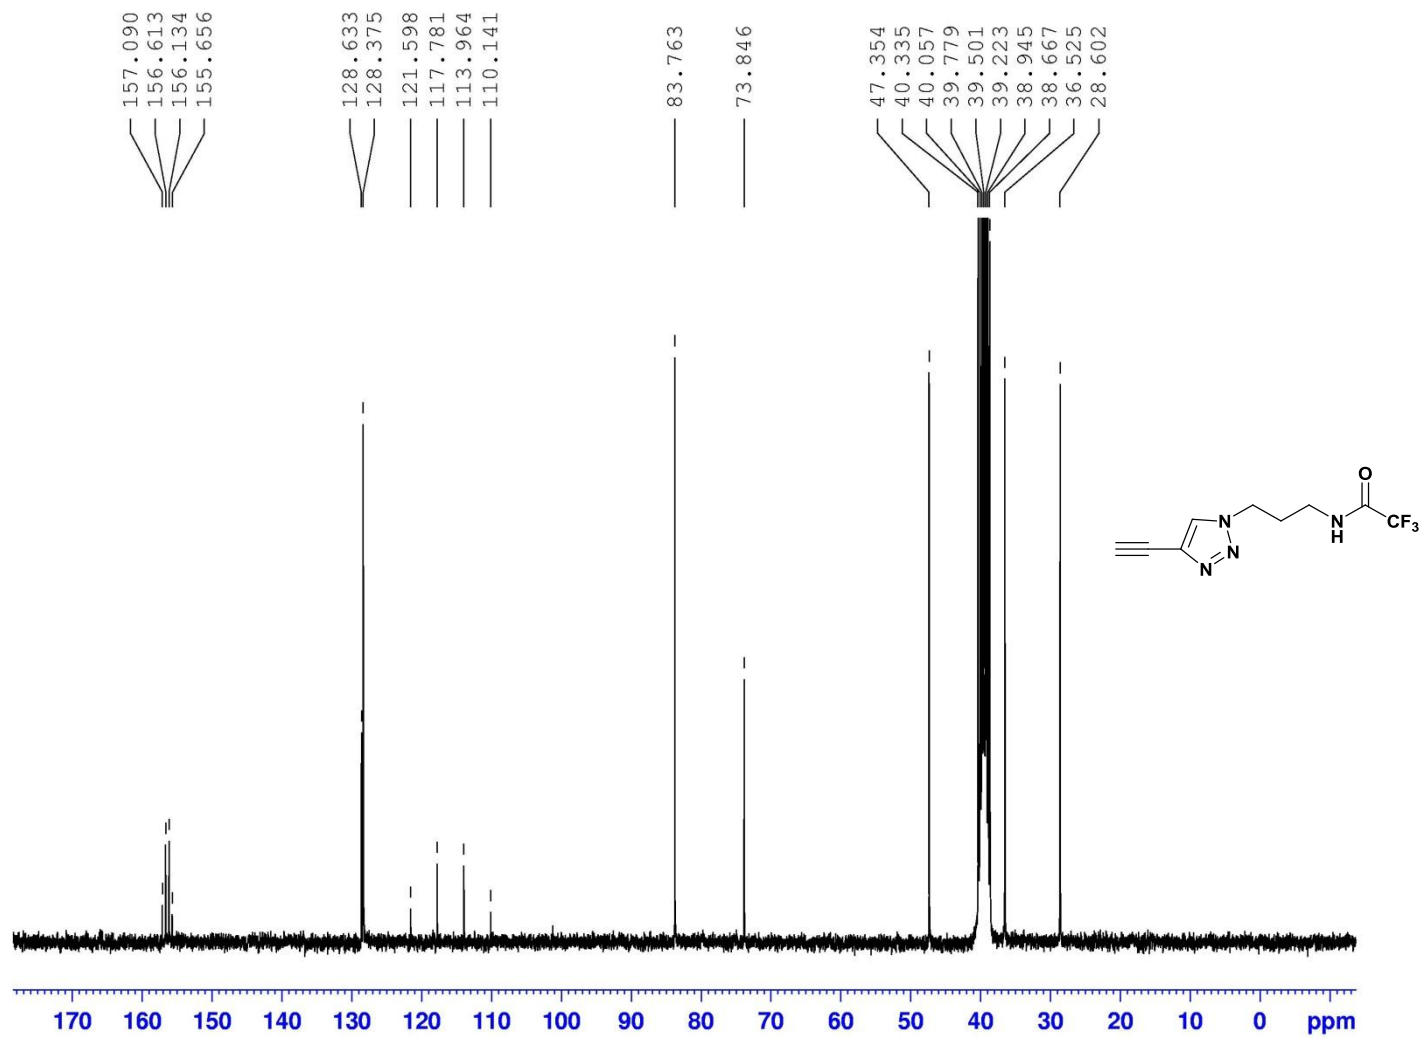

**Figure S14.**  $^{13}\text{C}$ -NMR spectrum of *N*-(3-(4-ethynyl-1*H*-1,2,3-triazol-1-yl)propyl)-2,2,2-trifluoroacetamide (13).

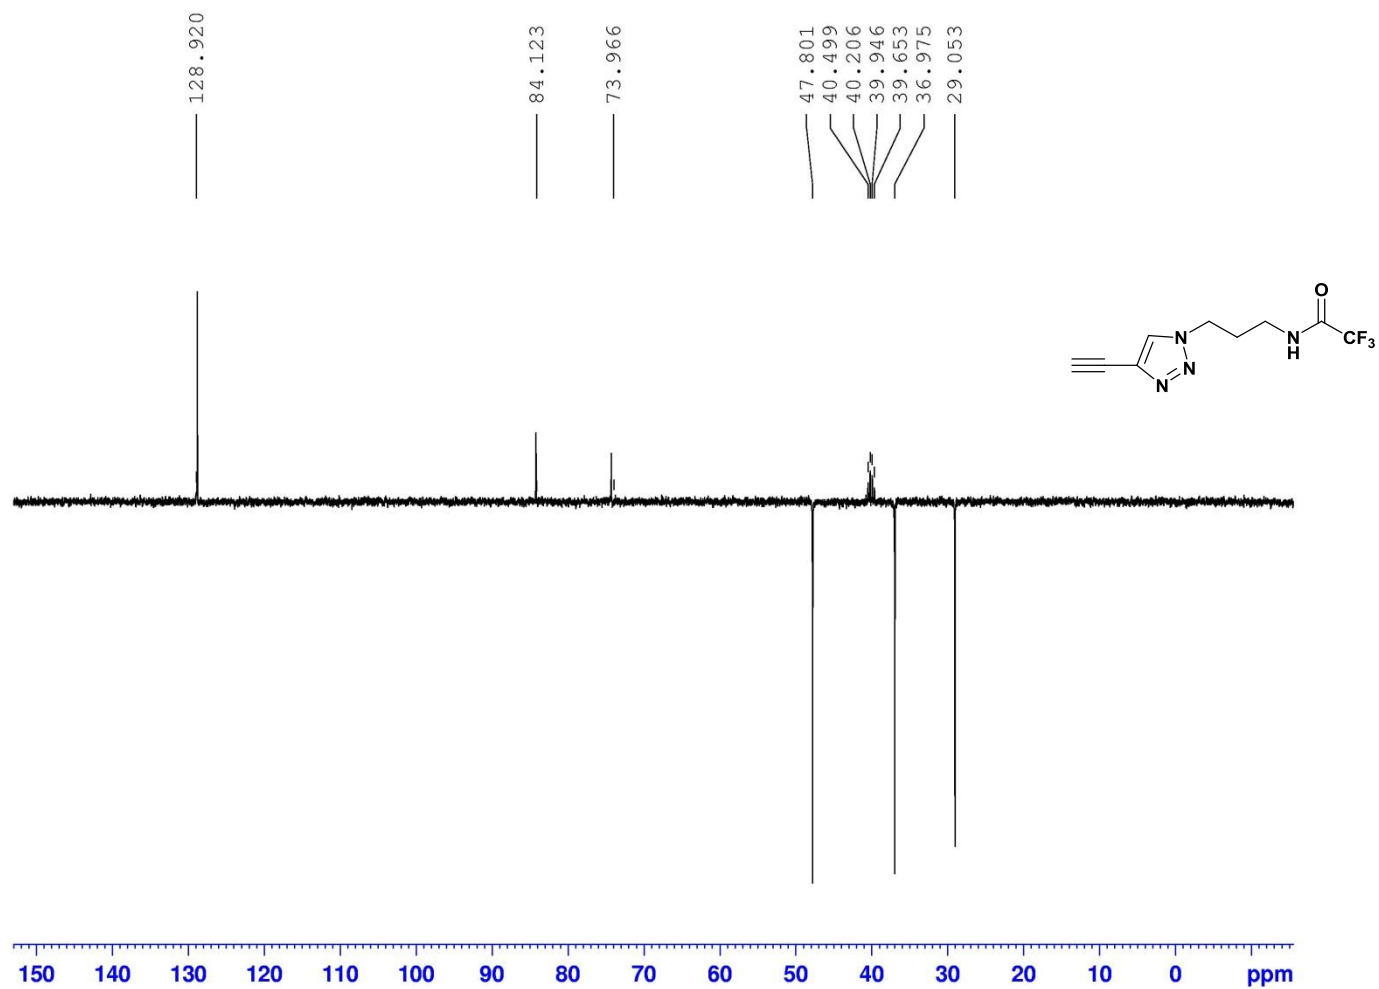

**Figure S15.** DEPT-135 spectrum of *N*-(3-(4-ethynyl-1*H*-1,2,3-triazol-1-yl)propyl)-2,2,2-trifluoroacetamide (**13**).

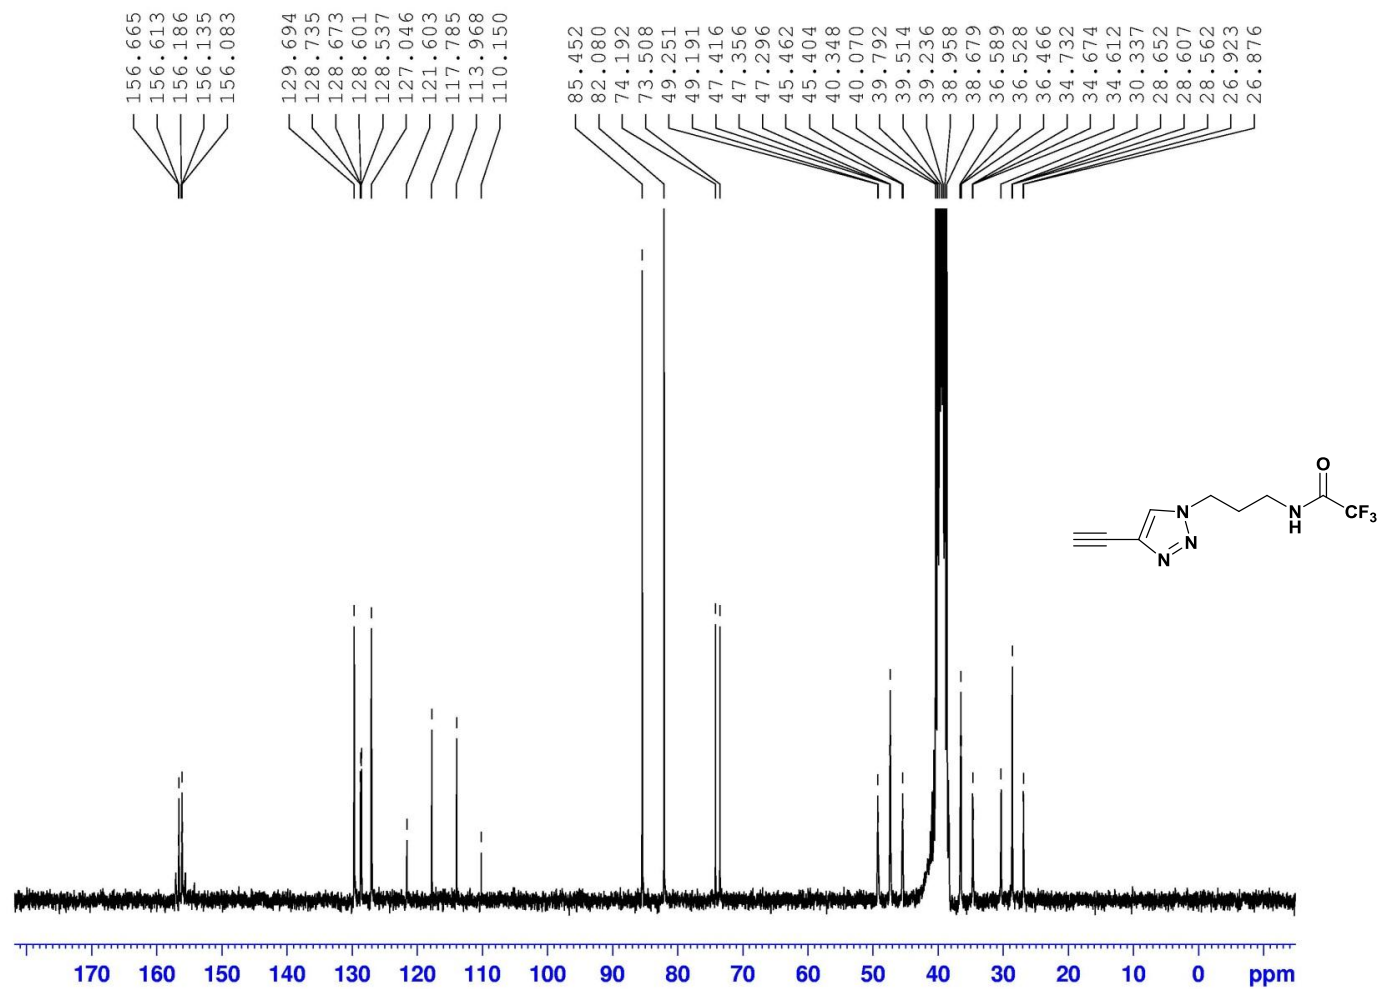

**Figure S16.**  $^1\text{H}$ - $^{13}\text{C}$ -gated decoupled spectrum of *N*-(3-(4-ethynyl-1*H*-1,2,3-triazol-1-yl)propyl)-2,2,2-trifluoroacetamide (**13**).

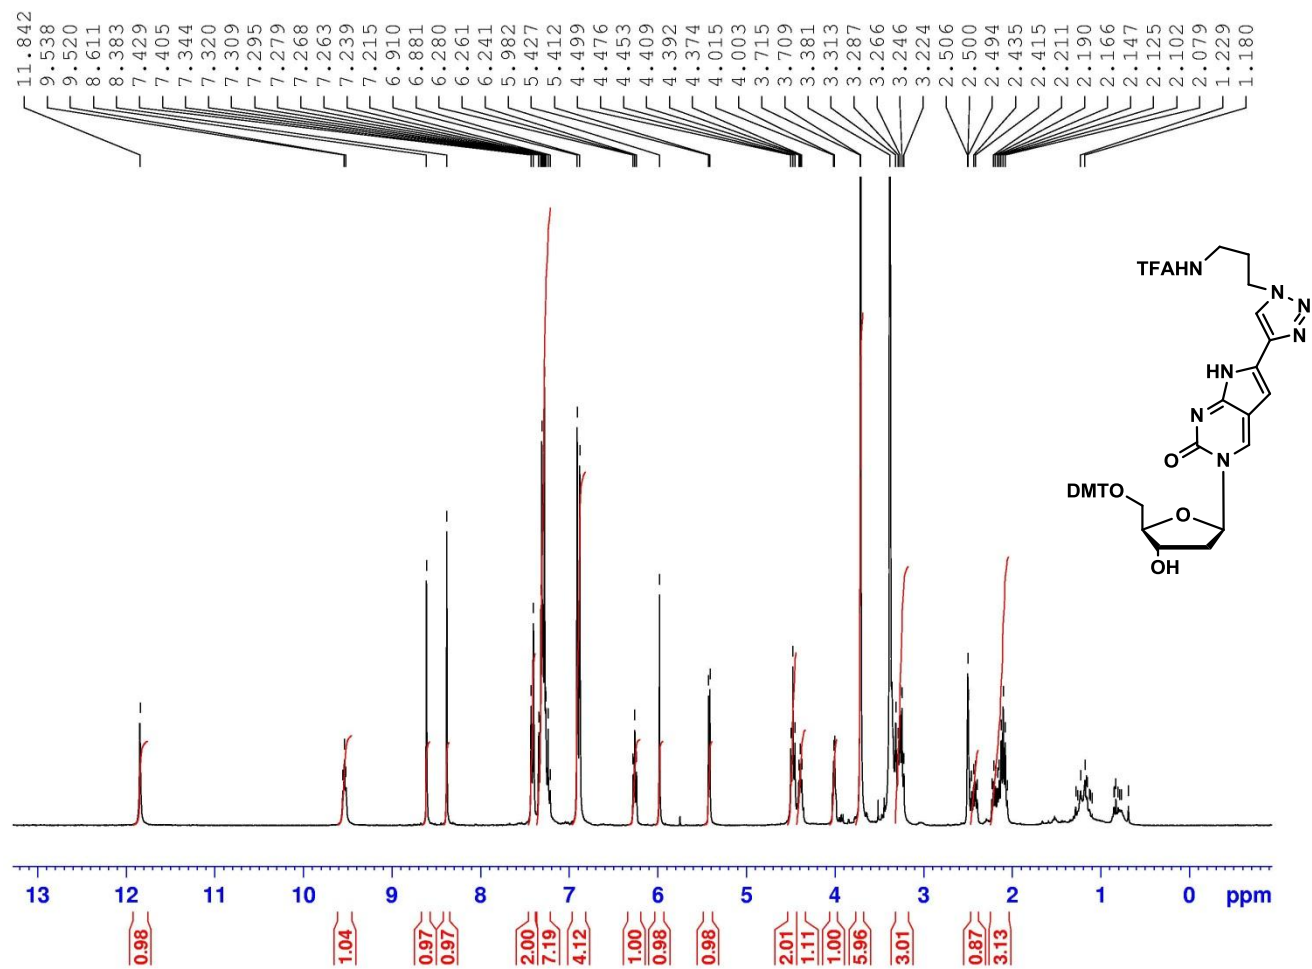

**Figure S17.** <sup>1</sup>H-NMR spectrum of trifluoroacetamide protected pyrrolo-dC analogue with DMT (**15**).

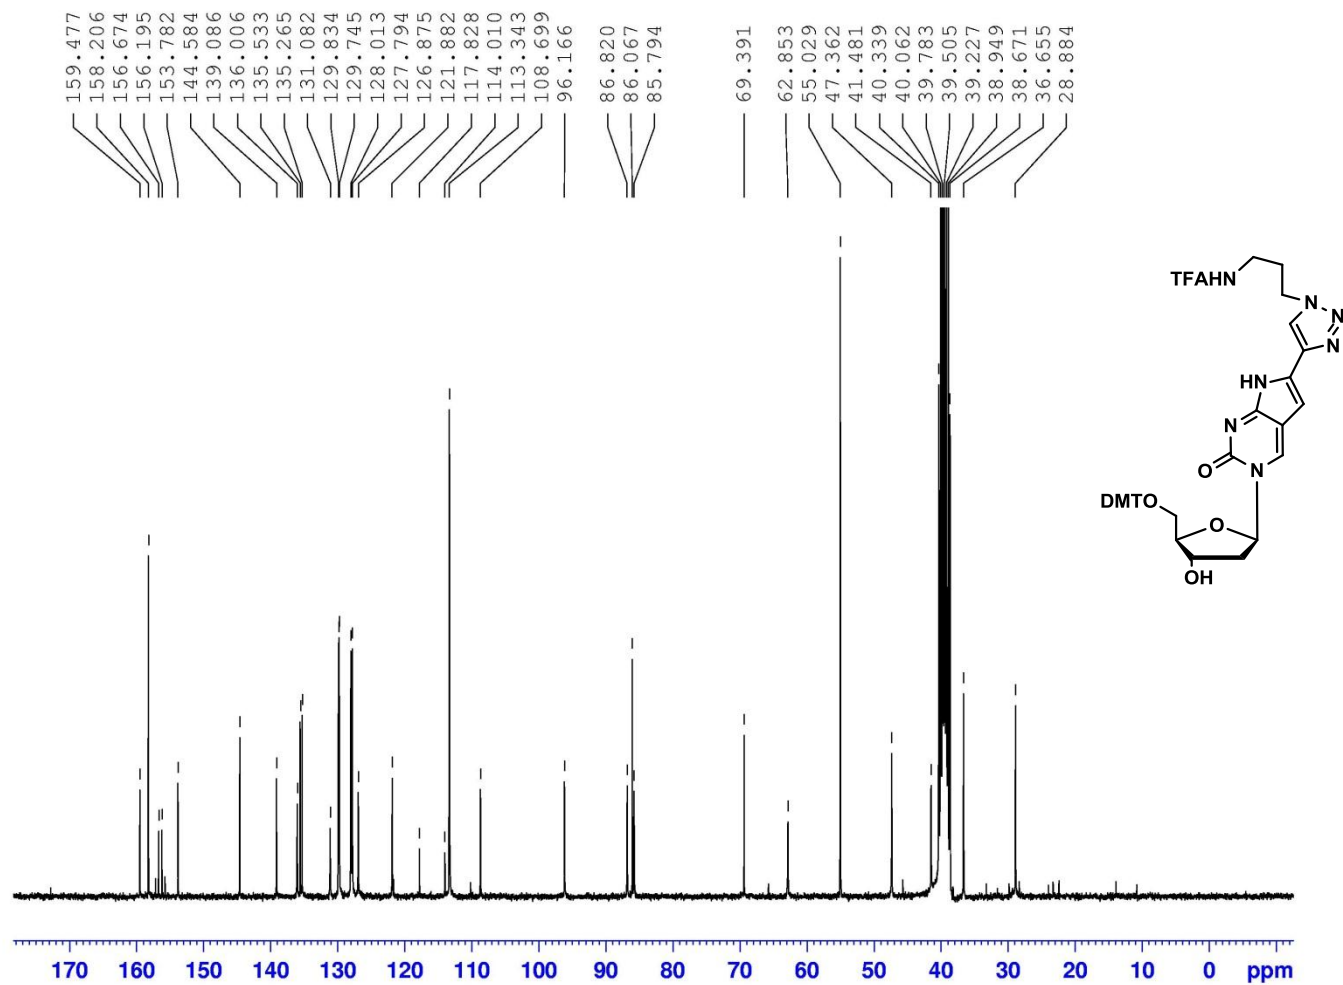

**Figure S18.**  $^{13}\text{C}$ -NMR spectrum of trifluoroacetamide protected pyrrolo-dC analogue with DMT (**15**).

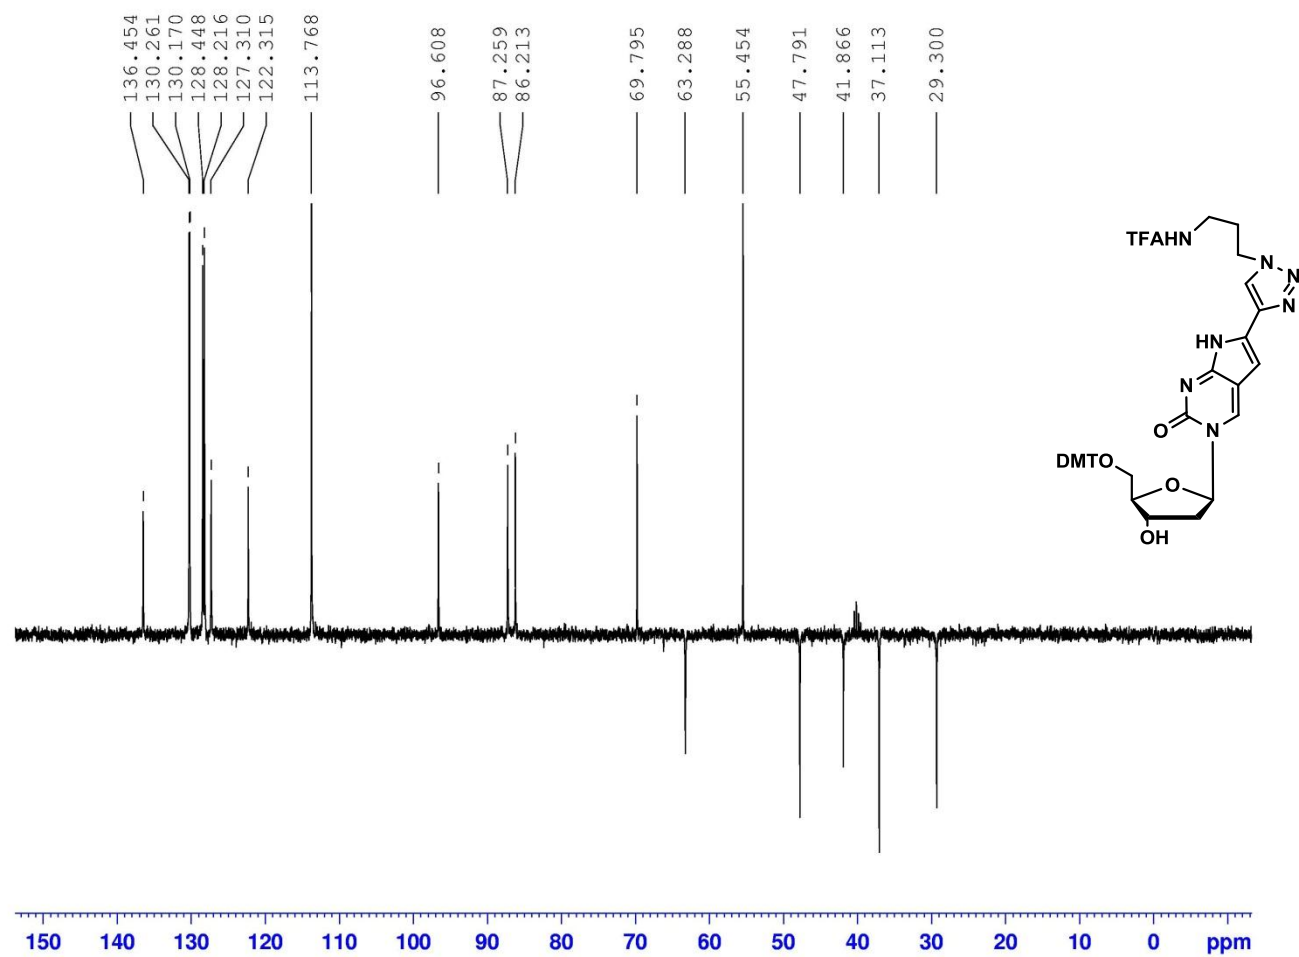

**Figure S19.** DEPT-135 spectrum of trifluoroacetamide protected pyrrolo-dC analogue with DMT (**15**).



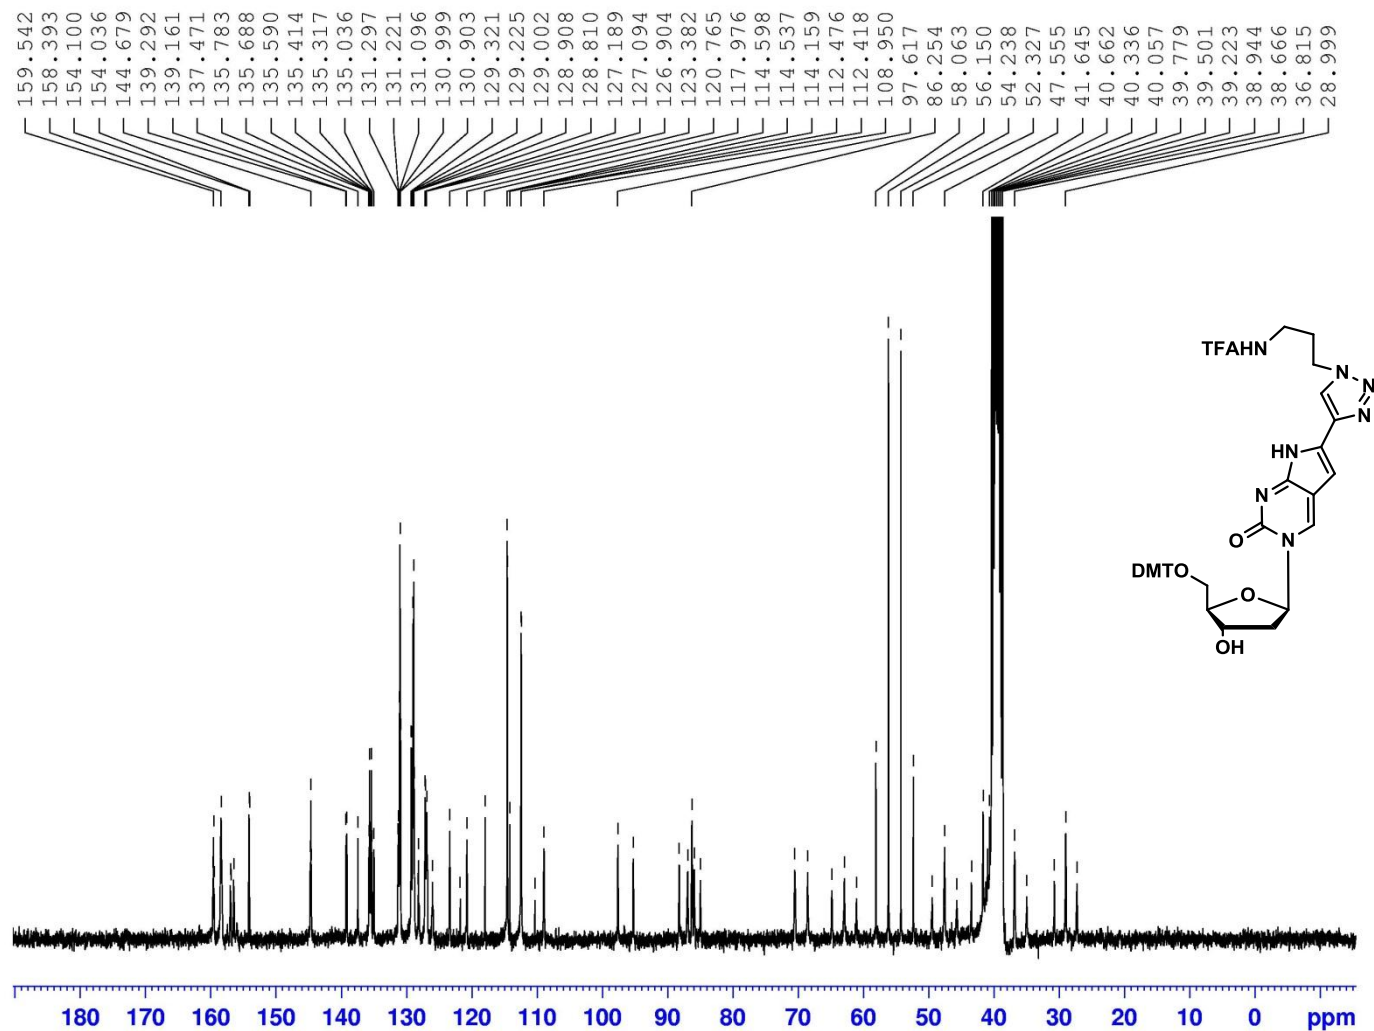

**Figure S20.**  $^1\text{H}$ - $^{13}\text{C}$ -gated decoupled spectrum of trifluoroacetamide protected pyrrolo-dC analogue with DMT (**15**).

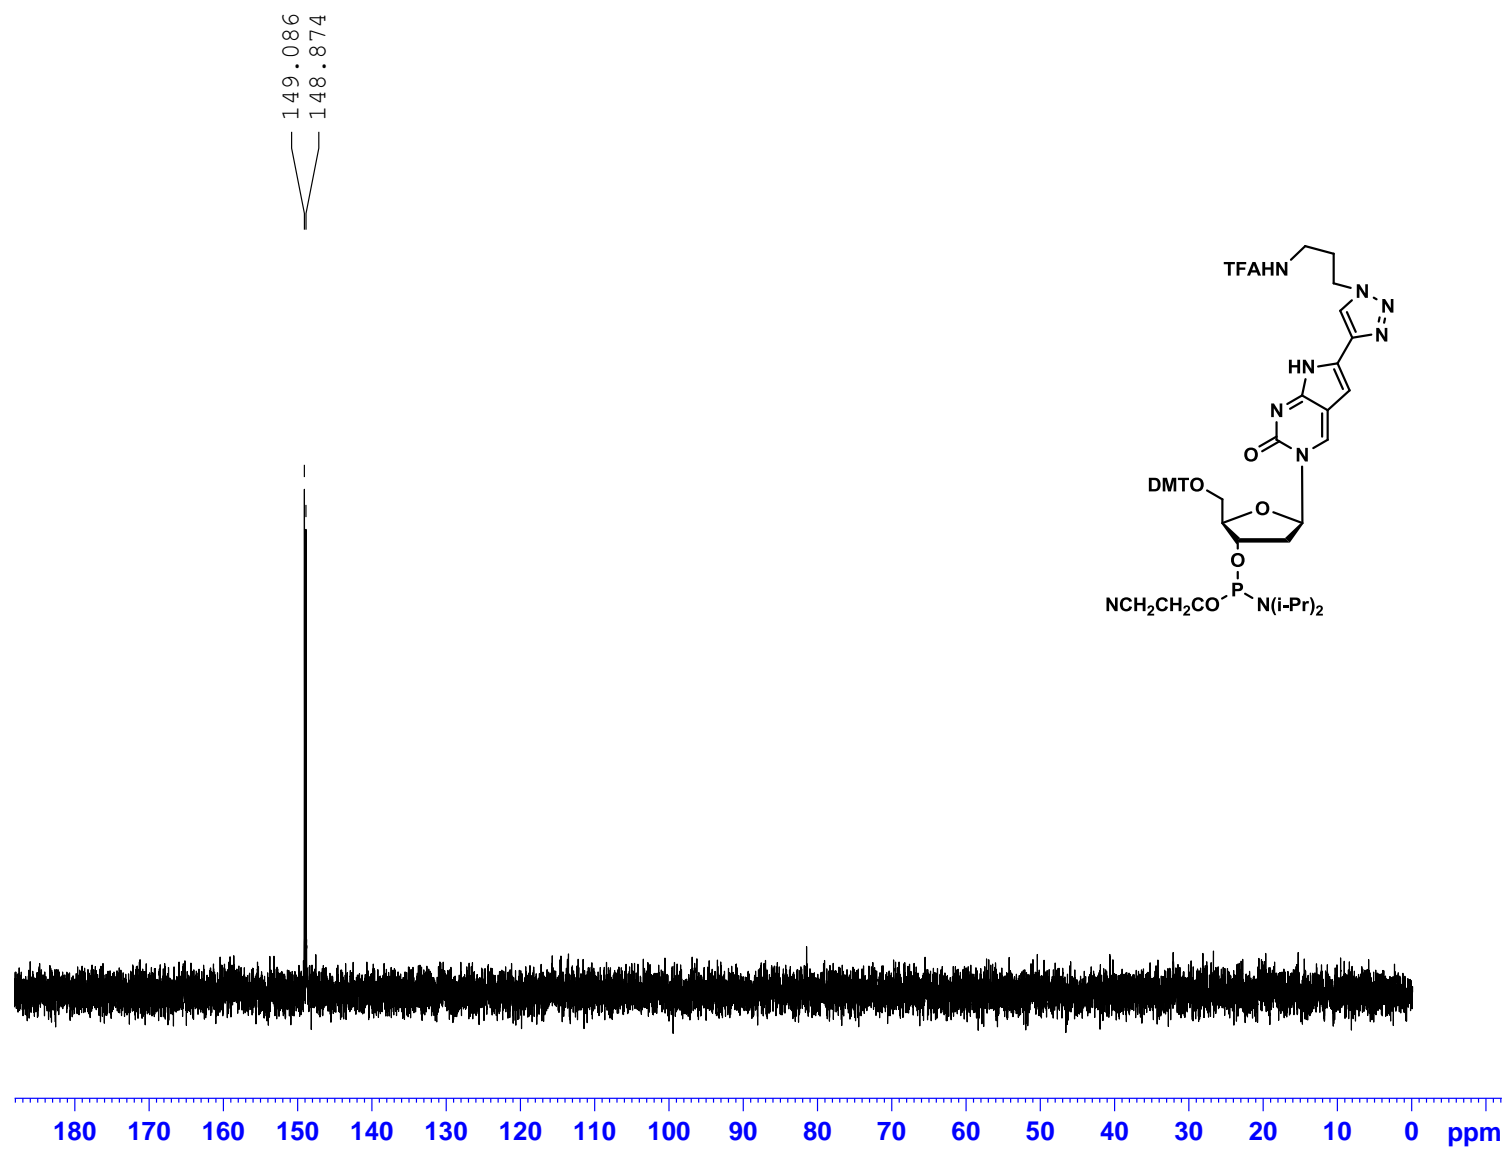

Figure S21.  $^{31}\text{P}$ -NMR spectrum of phosphoramidite 5.

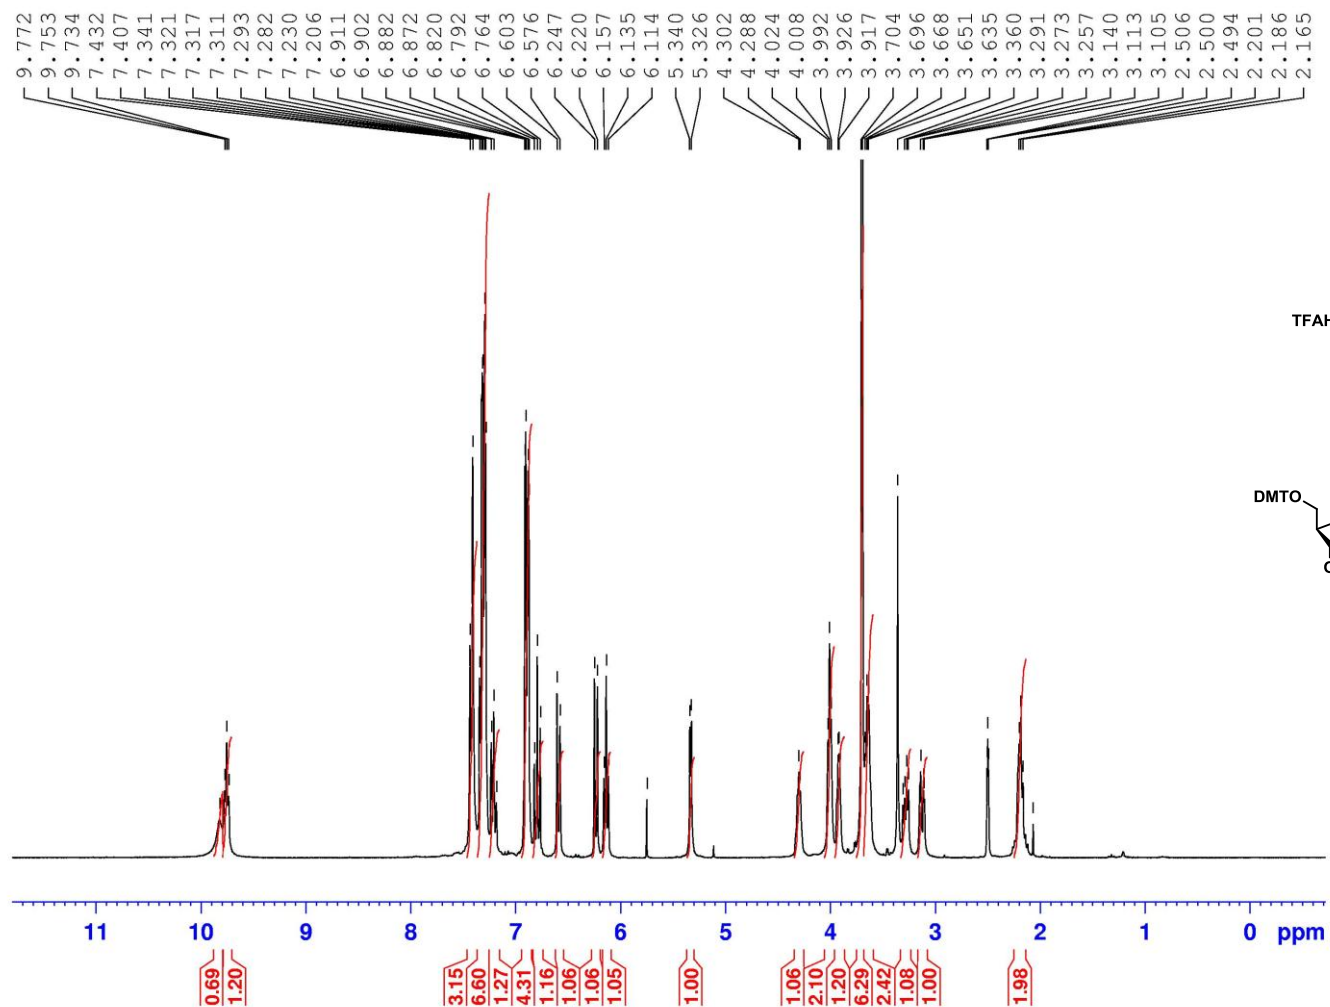

Figure S22. <sup>1</sup>H-NMR spectrum of the DMT-protected G-clamp.

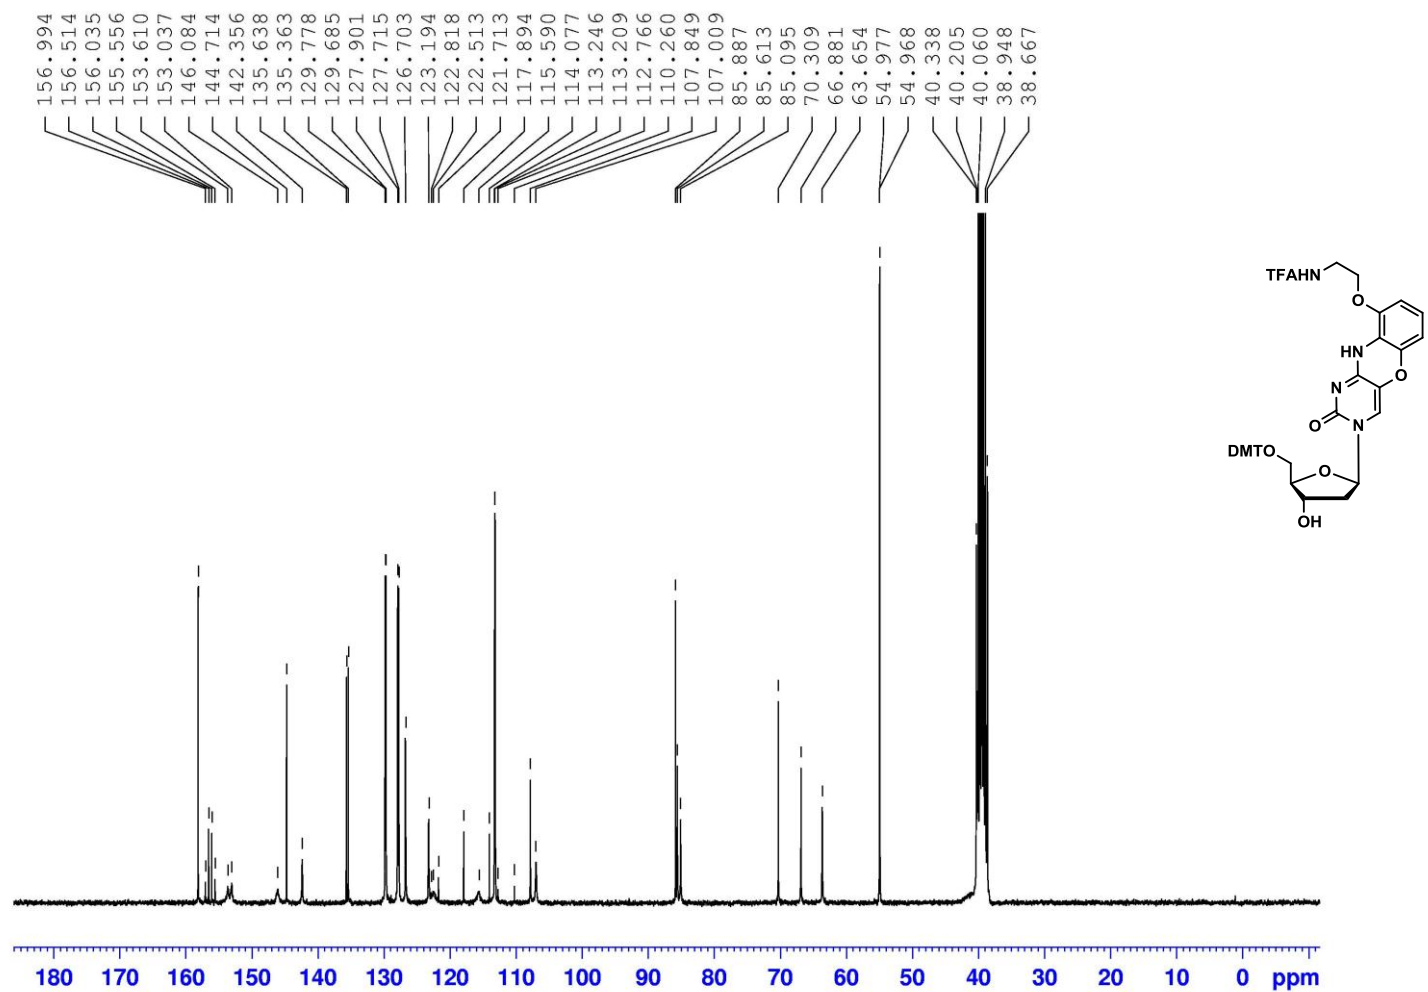

Figure S23.  $^{13}\text{C}$ -NMR spectrum of the DMT-protected G-clamp.

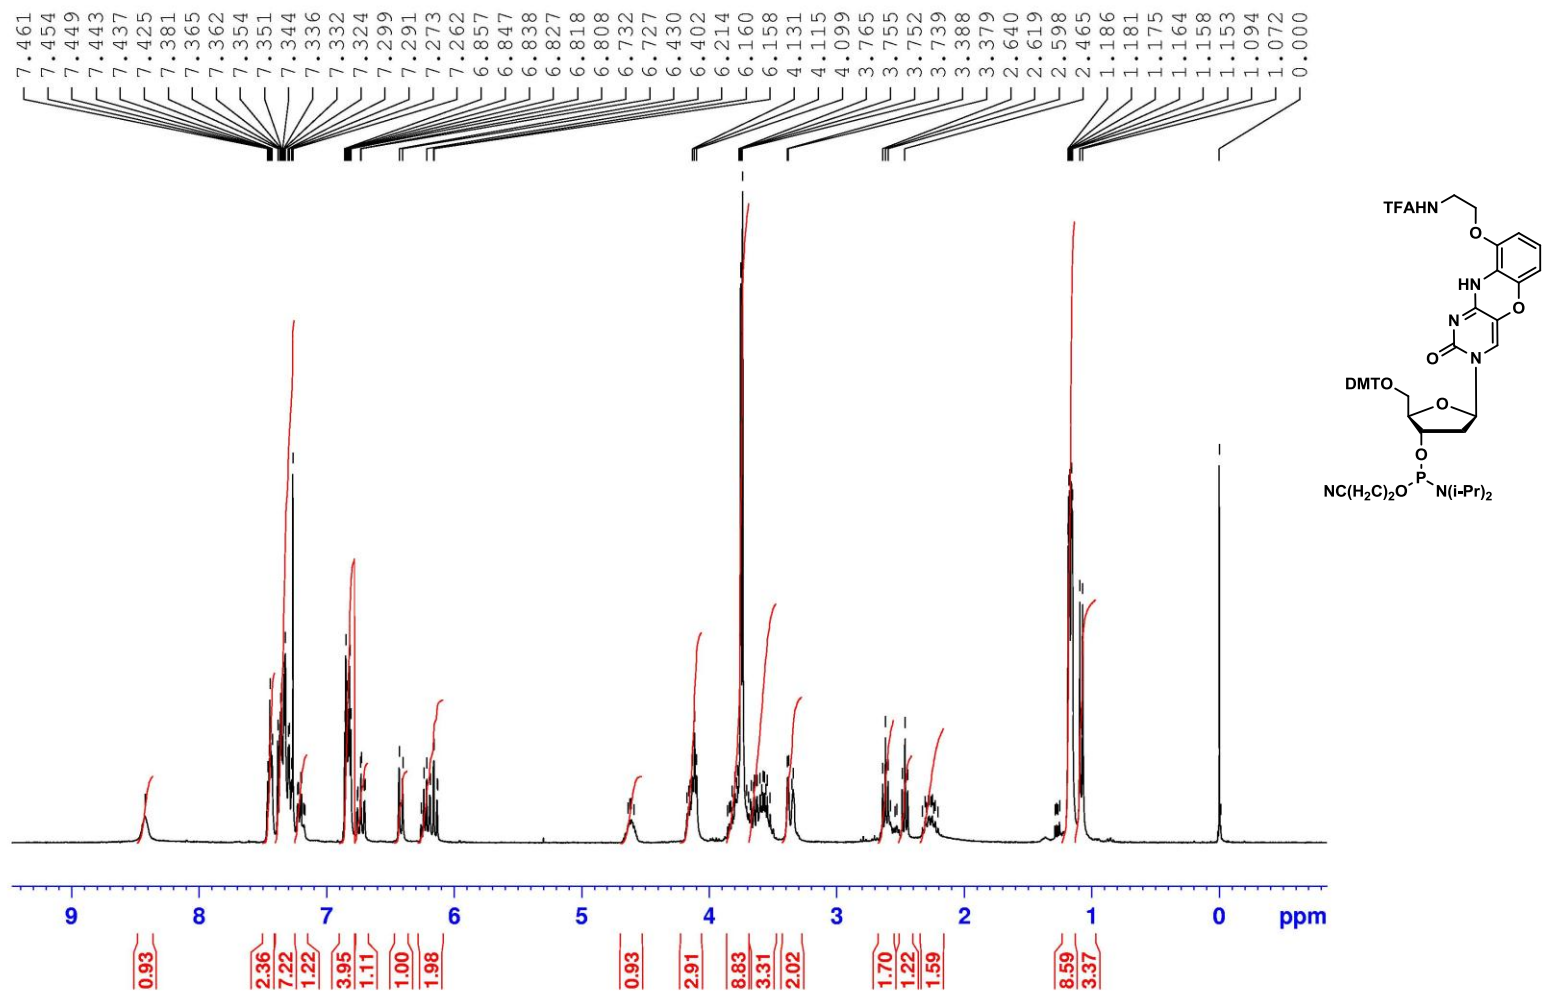

Figure S24. <sup>1</sup>H-NMR spectrum of phosphoramidite 16.

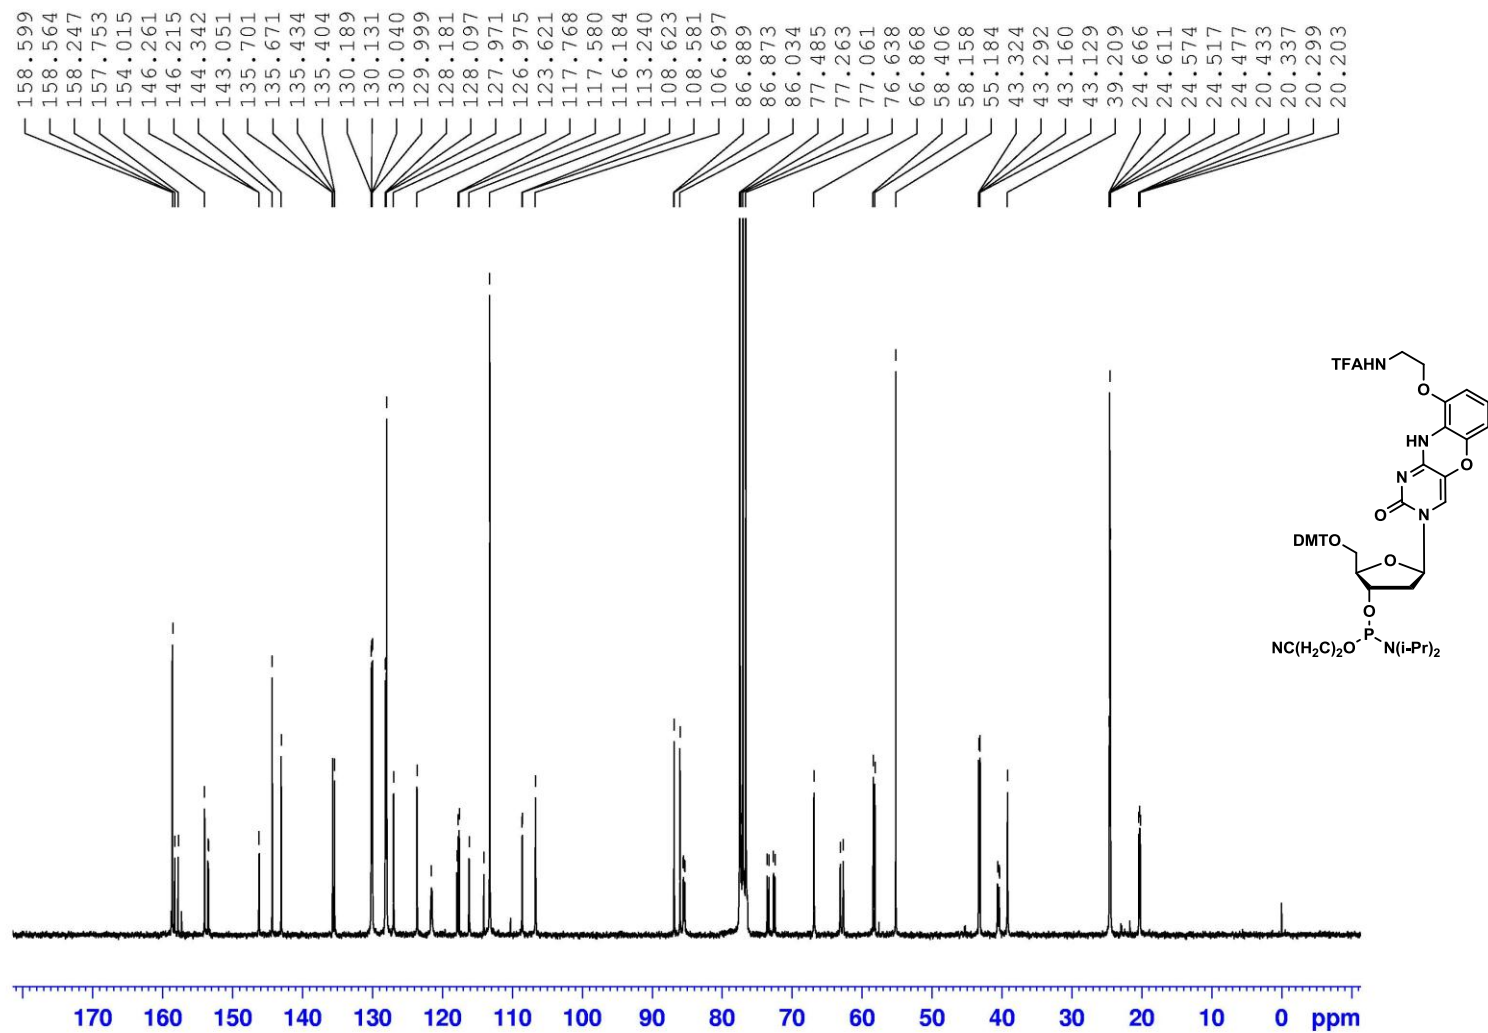

Figure S25. <sup>13</sup>C-NMR spectrum of phosphoramidite **16**.

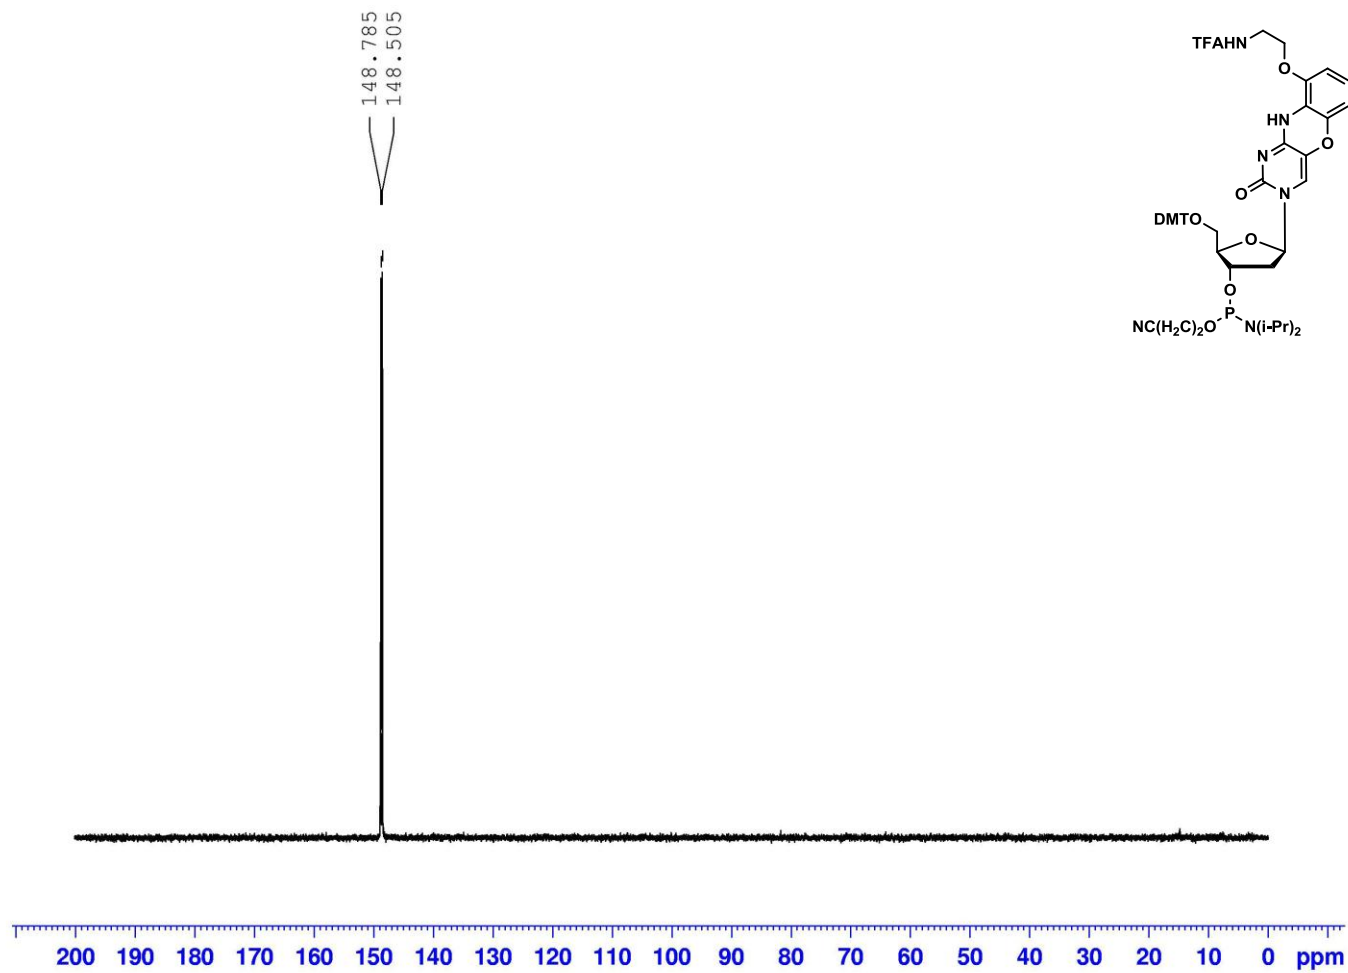

**Figure S26.**  $^{31}\text{P}$ -NMR spectrum of phosphoramidite **16**.
